# Supplementary material for: Conversion of extrinsic into intrinsic motivation and computer based testing (CBT)
Source: PubMed Central journal article supplement (PMC6006569; doi:10.1186/s12909-018-1249-4), 2018-06-19
Supplement: 12909_2018_1249_MOESM1_ESM.pdf [file 12909_2018_1249_MOESM1_ESM.pdf]

| gender | age    | q1    | q2   | q3   | q4   | q5   | q6   | q7   | q8   | q9   |
|--------|--------|-------|------|------|------|------|------|------|------|------|
| #NULL! | 20.00  | 1.000 | 2.00 | 1.00 | 1.00 | 1.00 | 1.00 | 1.00 | 1.00 | 2.00 |
| 2.00   | 20.00  | 4.000 | 4.00 | 3.00 | 1.00 | 1.00 | 1.00 | 1.00 | 1.00 | 1.00 |
| #NULL! | #NULL! | 1.000 | 1.00 | 1.00 | 2.00 | 2.00 | 5.00 | 3.00 | 2.00 | 5.00 |
| 2.00   | 19.00  | 3.000 | 5.00 | 4.00 | 3.00 | 2.00 | 1.00 | 1.00 | 3.00 | 3.00 |
| 1.00   | 20.00  | 2.000 | 1.00 | 2.00 | 2.00 | 3.00 | 2.00 | 1.00 | 3.00 | 2.00 |
| 2.00   | 20.00  | 3.000 | 2.00 | 2.00 | 1.00 | 1.00 | 1.00 | 3.00 | 2.00 | 2.00 |
| 1.00   | 37.00  | 3.000 | 2.00 | 2.00 | 3.00 | 2.00 | 2.00 | 2.00 | 3.00 | 1.00 |
| 2.00   | 21.00  | 3.000 | 3.00 | 2.00 | 2.00 | 2.00 | 3.00 | 3.00 | 3.00 | 2.00 |
| 1.00   | #NULL! | 2.000 | 3.00 | 4.00 | 3.00 | 4.00 | 4.00 | 2.00 | 3.00 | 3.00 |
| 2.00   | 18.00  | 3.000 | 3.00 | 2.00 | 2.00 | 3.00 | 3.00 | 3.00 | 4.00 | 4.00 |
| 2.00   | 20.00  | 5.000 | 4.00 | 2.00 | 1.00 | 2.00 | 2.00 | 2.00 | 2.00 | 1.00 |
| 1.00   | 18.00  | 1.000 | 2.00 | 3.00 | 1.00 | 2.00 | 2.00 | 1.00 | 1.00 | 2.00 |
| 1.00   | 20.00  | 4.000 | 4.00 | 4.00 | 4.00 | 4.00 | 4.00 | 3.00 | 4.00 | 2.00 |
| 1.00   | 21.00  | 3.000 | 3.00 | 3.00 | 3.00 | 3.00 | 4.00 | 3.00 | 3.00 | 1.00 |
| 2.00   | 20.00  | 3.000 | 2.00 | 3.00 | 3.00 | 2.00 | 2.00 | 3.00 | 3.00 | 2.00 |
| 2.00   | 23.00  | 2.000 | 1.00 | 3.00 | 1.00 | 1.00 | 2.00 | 4.00 | 3.00 | 3.00 |
| 2.00   | 20.00  | 2.000 | 2.00 | 3.00 | 1.00 | 1.00 | 2.00 | 2.00 | 3.00 | 2.00 |
| 2.00   | 19.00  | 3.000 | 2.00 | 2.00 | 2.00 | 2.00 | 1.00 | 3.00 | 3.00 | 2.00 |
| 2.00   | 19.00  | 3.000 | 2.00 | 2.00 | 2.00 | 2.00 | 2.00 | 1.00 | 3.00 | 3.00 |
| 2.00   | 19.00  | 2.000 | 3.00 | 2.00 | 2.00 | 2.00 | 2.00 | 2.00 | 3.00 | 2.00 |
| 1.00   | 21.00  | 1.000 | 2.00 | 1.00 | 1.00 | 1.00 | 1.00 | 1.00 | 1.00 | 2.00 |
| 2.00   | 18.00  | 4.000 | 3.00 | 2.00 | 3.00 | 4.00 | 4.00 | 3.00 | 2.00 | 1.00 |
| 1.00   | 20.00  | 2.000 | 2.00 | 2.00 | 3.00 | 2.00 | 2.00 | 2.00 | 3.00 | 2.00 |
| 1.00   | 19.00  | 1.000 | 2.00 | 1.00 | 1.00 | 1.00 | 1.00 | 1.00 | 1.00 | 2.00 |
| 2.00   | 19.00  | 3.000 | 2.00 | 2.00 | 4.00 | 4.00 | 2.00 | 3.00 | 2.00 | 4.00 |
| 1.00   | 27.00  | 1.000 | 1.00 | 2.00 | 2.00 | 2.00 | 3.00 | 2.00 | 2.00 | 2.00 |
| 2.00   | 19.00  | 3.000 | 3.00 | 2.00 | 3.00 | 2.00 | 3.00 | 3.00 | 2.00 | 3.00 |
| 2.00   | 20.00  | 1.000 | 1.00 | 2.00 | 2.00 | 2.00 | 4.00 | 4.00 | 1.00 | 2.00 |
| 2.00   | 20.00  | 3.000 | 2.00 | 2.00 | 2.00 | 3.00 | 2.00 | 3.00 | 2.00 | 2.00 |
| 2.00   | 19.00  | 3.000 | 3.00 | 2.00 | 1.00 | 1.00 | 5.00 | 3.00 | 1.00 | 1.00 |
| 2.00   | #NULL! | 4.000 | 3.00 | 3.00 | 2.00 | 2.00 | 2.00 | 3.00 | 2.00 | 1.00 |
| 2.00   | 19.00  | 1.000 | 2.00 | 1.00 | 1.00 | 1.00 | 2.00 | 1.00 | 1.00 | 2.00 |
| #NULL! | #NULL! | 2.000 | 3.00 | 2.00 | 2.00 | 2.00 | 3.00 | 3.00 | 4.00 | 3.00 |
| 2.00   | 19.00  | 3.000 | 2.00 | 4.00 | 4.00 | 4.00 | 3.00 | 4.00 | 4.00 | 3.00 |
| 2.00   | 18.00  | 3.000 | 3.00 | 2.00 | 2.00 | 3.00 | 3.00 | 2.00 | 2.00 | 3.00 |
| 2.00   | 19.00  | 2.000 | 2.00 | 2.00 | 1.00 | 3.00 | 3.00 | 3.00 | 2.00 | 4.00 |

|        |        |       |      |      |      |      |      |      |      |      |
|--------|--------|-------|------|------|------|------|------|------|------|------|
| 2.00   | 19.00  | 2.000 | 3.00 | 2.00 | 2.00 | 2.00 | 1.00 | 3.00 | 3.00 | 1.00 |
| 2.00   | 19.00  | 2.000 | 3.00 | 2.00 | 2.00 | 2.00 | 1.00 | 3.00 | 3.00 | 1.00 |
| 2.00   | 20.00  | 5.000 | 5.00 | 3.00 | 3.00 | 2.00 | 2.00 | 3.00 | 3.00 | 2.00 |
| 2.00   | 20.00  | 3.000 | 5.00 | 3.00 | 2.00 | 2.00 | 2.00 | 3.00 | 2.00 | 2.00 |
| 2.00   | 19.00  | 5.000 | 1.00 | 2.00 | 2.00 | 3.00 | 1.00 | 2.00 | 2.00 | 2.00 |
| 2.00   | 20.00  | 3.000 | 3.00 | 3.00 | 3.00 | 2.00 | 3.00 | 4.00 | 4.00 | 2.00 |
| 2.00   | 19.00  | 3.000 | 2.00 | 2.00 | 2.00 | 2.00 | 3.00 | 3.00 | 3.00 | 2.00 |
| 2.00   | 20.00  | 3.000 | 3.00 | 1.00 | 1.00 | 2.00 | 3.00 | 3.00 | 2.00 | 2.00 |
| 2.00   | 20.00  | 3.000 | 4.00 | 4.00 | 2.00 | 3.00 | 5.00 | 3.00 | 3.00 | 4.00 |
| 2.00   | 19.00  | 2.000 | 2.00 | 3.00 | 2.00 | 2.00 | 2.00 | 3.00 | 3.00 | 2.00 |
| 2.00   | 19.00  | 1.000 | 3.00 | 2.00 | 3.00 | 2.00 | 3.00 | 3.00 | 2.00 | 1.00 |
| 2.00   | 22.00  | 2.000 | 3.00 | 2.00 | 2.00 | 2.00 | 1.00 | 3.00 | 3.00 | 1.00 |
| #NULL! | 19.00  | 4.000 | 4.00 | 3.00 | 2.00 | 2.00 | 2.00 | 2.00 | 5.00 | 2.00 |
| #NULL! | #NULL! | 2.000 | 2.00 | 2.00 | 1.00 | 1.00 | 2.00 | 2.00 | 2.00 | 2.00 |
| #NULL! | 22.00  | 1.000 | 2.00 | 1.00 | 3.00 | 1.00 | 3.00 | 3.00 | 1.00 | 3.00 |
| 2.00   | 18.00  | 1.000 | 2.00 | 1.00 | 3.00 | 1.00 | 3.00 | 3.00 | 1.00 | 3.00 |
| 2.00   | 19.00  | 3.000 | 1.00 | 1.00 | 2.00 | 2.00 | 1.00 | 1.00 | 1.00 | 2.00 |
| 2.00   | 19.00  | 4.000 | 3.00 | 4.00 | 3.00 | 4.00 | 4.00 | 3.00 | 4.00 | 3.00 |
| 2.00   | 18.00  | 1.000 | 2.00 | 1.00 | 3.00 | 1.00 | 3.00 | 3.00 | 1.00 | 3.00 |
| 2.00   | 20.00  | 1.000 | 2.00 | 1.00 | 3.00 | 1.00 | 3.00 | 3.00 | 1.00 | 3.00 |
| 2.00   | #NULL! | 2.000 | 2.00 | 3.00 | 2.00 | 2.00 | 2.00 | 1.00 | 2.00 | 3.00 |
| 2.00   | 19.00  | 2.000 | 3.00 | 3.00 | 1.00 | 2.00 | 4.00 | 1.00 | 3.00 | 4.00 |
| 2.00   | 21.00  | 2.000 | 1.00 | 1.00 | 1.00 | 2.00 | 1.00 | 2.00 | 2.00 | 1.00 |
| 2.00   | 21.00  | 3.000 | 2.00 | 2.00 | 2.00 | 4.00 | 1.00 | 2.00 | 2.00 | 1.00 |
| 2.00   | 22.00  | 2.000 | 3.00 | 2.00 | 1.00 | 1.00 | 1.00 | 1.00 | 2.00 | 2.00 |
| 2.00   | 21.00  | 2.000 | 2.00 | 2.00 | 2.00 | 4.00 | 1.00 | 2.00 | 1.00 | 5.00 |
| 2.00   | 19.00  | 1.000 | 2.00 | 1.00 | 3.00 | 1.00 | 3.00 | 3.00 | 1.00 | 3.00 |
| 2.00   | 20.00  | 1.000 | 3.00 | 1.00 | 3.00 | 1.00 | 3.00 | 3.00 | 1.00 | 3.00 |
| 2.00   | 19.00  | 2.000 | 2.00 | 2.00 | 2.00 | 2.00 | 3.00 | 3.00 | 3.00 | 3.00 |
| 2.00   | 20.00  | 1.000 | 2.00 | 3.00 | 1.00 | 3.00 | 3.00 | 2.00 | 3.00 | 3.00 |
| 2.00   | 19.00  | 1.000 | 2.00 | 3.00 | 1.00 | 3.00 | 3.00 | 2.00 | 3.00 | 3.00 |
| 2.00   | 19.00  | 2.000 | 1.00 | 2.00 | 2.00 | 2.00 | 2.00 | 2.00 | 2.00 | 2.00 |
| 2.00   | 21.00  | 1.000 | 2.00 | 1.00 | 1.00 | 2.00 | 3.00 | 1.00 | 1.00 | 1.00 |
| 2.00   | 19.00  | 1.000 | 2.00 | 2.00 | 1.00 | 1.00 | 1.00 | 2.00 | 1.00 | 2.00 |
| 1.00   | 21.00  | 1.000 | 1.00 | 1.00 | 2.00 | 1.00 | 1.00 | 1.00 | 1.00 | 1.00 |
| 2.00   | 22.00  | 1.000 | 3.00 | 4.00 | 1.00 | 5.00 | 1.00 | 3.00 | 2.00 | 4.00 |
| 1.00   | 19.00  | 2.000 | 2.00 | 1.00 | 2.00 | 1.00 | 3.00 | 2.00 | 1.00 | 1.00 |

|        |        |       |      |      |      |      |      |      |      |      |
|--------|--------|-------|------|------|------|------|------|------|------|------|
| 2.00   | 19.00  | 1.000 | 1.00 | 1.00 | 2.00 | 2.00 | 1.00 | 3.00 | 2.00 | 2.00 |
| 2.00   | 18.00  | 1.000 | 1.00 | 1.00 | 1.00 | 1.00 | 2.00 | 3.00 | 3.00 | 3.00 |
| 2.00   | 20.00  | 2.000 | 1.00 | 2.00 | 2.00 | 1.00 | 2.00 | 3.00 | 1.00 | 1.00 |
| 1.00   | 19.00  | 4.000 | 4.00 | 2.00 | 3.00 | 2.00 | 4.00 | 2.00 | 2.00 | 2.00 |
| 1.00   | 19.00  | 4.000 | 3.00 | 4.00 | 3.00 | 2.00 | 2.00 | 4.00 | 2.00 | 3.00 |
| #NULL! | #NULL! | 2.000 | 2.00 | 3.00 | 4.00 | 2.00 | 3.00 | 4.00 | 2.00 | 1.00 |
| 2.00   | #NULL! | 3.000 | 3.00 | 2.00 | 4.00 | 3.00 | 2.00 | 4.00 | 2.00 | 3.00 |
| 2.00   | 18.00  | 1.000 | 2.00 | 3.00 | 1.00 | 2.00 | 3.00 | 1.00 | 2.00 | 3.00 |
| 1.00   | 20.00  | 5.000 | 1.00 | 2.00 | 1.00 | 1.00 | 2.00 | 1.00 | 2.00 | 0.00 |
| 2.00   | 20.00  | 1.000 | 2.00 | 1.00 | 1.00 | 2.00 | 1.00 | 2.00 | 2.00 | 1.00 |
| 2.00   | 27.00  | 2.000 | 1.00 | 2.00 | 2.00 | 1.00 | 3.00 | 2.00 | 2.00 | 1.00 |
| 2.00   | 27.00  | 2.000 | 2.00 | 1.00 | 2.00 | 2.00 | 1.00 | 2.00 | 1.00 | 1.00 |
| 1.00   | 20.00  | 1.000 | 1.00 | 2.00 | 1.00 | 3.00 | 2.00 | 1.00 | 1.00 | 2.00 |
| 2.00   | 21.00  | 1.000 | 2.00 | 1.00 | 1.00 | 2.00 | 1.00 | 2.00 | 2.00 | 1.00 |
| 2.00   | 20.00  | 1.000 | 2.00 | 1.00 | 2.00 | 2.00 | 1.00 | 2.00 | 1.00 | 1.00 |
| 2.00   | 18.00  | 1.000 | 2.00 | 2.00 | 1.00 | 1.00 | 1.00 | 2.00 | 1.00 | 2.00 |
| #NULL! | #NULL! | 2.000 | 2.00 | 2.00 | 2.00 | 2.00 | 1.00 | 1.00 | 1.00 | 3.00 |
| 1.00   | 20.00  | 1.000 | 2.00 | 2.00 | 1.00 | 1.00 | 2.00 | 1.00 | 2.00 | 1.00 |
| 1.00   | 20.00  | 2.000 | 3.00 | 3.00 | 2.00 | 3.00 | 2.00 | 2.00 | 3.00 | 3.00 |
| 2.00   | #NULL! | 2.000 | 3.00 | 3.00 | 2.00 | 3.00 | 2.00 | 2.00 | 3.00 | 3.00 |
| 2.00   | 21.00  | 4.000 | 3.00 | 2.00 | 1.00 | 2.00 | 3.00 | 2.00 | 1.00 | 2.00 |
| 2.00   | 18.00  | 2.000 | 2.00 | 1.00 | 2.00 | 1.00 | 1.00 | 2.00 | 1.00 | 2.00 |
| 2.00   | 20.00  | 1.000 | 1.00 | 1.00 | 2.00 | 3.00 | 3.00 | 4.00 | 4.00 | 2.00 |
| 2.00   | 18.00  | 3.000 | 3.00 | 1.00 | 1.00 | 2.00 | 4.00 | 2.00 | 4.00 | 2.00 |
| 1.00   | 20.00  | 1.000 | 1.00 | 1.00 | 1.00 | 1.00 | 1.00 | 1.00 | 2.00 | 2.00 |
| 2.00   | 20.00  | 1.000 | 2.00 | 2.00 | 1.00 | 1.00 | 1.00 | 1.00 | 2.00 | 1.00 |
| 1.00   | 23.00  | 2.000 | 1.00 | 1.00 | 1.00 | 1.00 | 1.00 | 3.00 | 2.00 | 1.00 |
| 2.00   | 18.00  | 2.000 | 2.00 | 2.00 | 1.00 | 1.00 | 1.00 | 2.00 | 2.00 | 2.00 |
| 2.00   | 19.00  | 1.000 | 2.00 | 2.00 | 1.00 | 2.00 | 1.00 | 2.00 | 1.00 | 2.00 |
| #NULL! | #NULL! | 1.000 | 1.00 | 1.00 | 1.00 | 1.00 | 1.00 | 2.00 | 2.00 | 2.00 |
| 2.00   | 19.00  | 1.000 | 1.00 | 2.00 | 1.00 | 2.00 | 2.00 | 1.00 | 2.00 | 1.00 |
| 2.00   | 18.00  | 4.000 | 3.00 | 2.00 | 2.00 | 2.00 | 3.00 | 3.00 | 4.00 | 3.00 |
| #NULL! | 19.00  | 2.000 | 2.00 | 3.00 | 2.00 | 1.00 | 1.00 | 2.00 | 2.00 | 1.00 |
| 2.00   | 21.00  | 1.000 | 2.00 | 2.00 | 2.00 | 1.00 | 4.00 | 2.00 | 3.00 | 1.00 |
| 2.00   | 19.00  | 4.000 | 2.00 | 3.00 | 5.00 | 3.00 | 1.00 | 5.00 | 3.00 | 3.00 |
| 2.00   | 19.00  | 2.000 | 2.00 | 2.00 | 2.00 | 2.00 | 2.00 | 2.00 | 3.00 | 1.00 |
| 2.00   | 18.00  | 3.000 | 4.00 | 3.00 | 2.00 | 2.00 | 3.00 | 4.00 | 3.00 | 4.00 |

|        |        |       |      |      |      |      |      |      |      |      |
|--------|--------|-------|------|------|------|------|------|------|------|------|
| 1.00   | 19.00  | 1.000 | 2.00 | 1.00 | 2.00 | 2.00 | 1.00 | 2.00 | 2.00 | 1.00 |
| 2.00   | 21.00  | 1.000 | 2.00 | 2.00 | 1.00 | 1.00 | 2.00 | 1.00 | 2.00 | 1.00 |
| 2.00   | 21.00  | 1.000 | 1.00 | 1.00 | 1.00 | 1.00 | 2.00 | 2.00 | 2.00 | 1.00 |
| #NULL! | #NULL! | 1.000 | 2.00 | 1.00 | 2.00 | 2.00 | 2.00 | 2.00 | 2.00 | 1.00 |
| 1.00   | #NULL! | 1.000 | 2.00 | 1.00 | 2.00 | 2.00 | 2.00 | 1.00 | 2.00 | 5.00 |
| 2.00   | 17.00  | 2.000 | 1.00 | 1.00 | 1.00 | 1.00 | 2.00 | 3.00 | 1.00 | 1.00 |
| #NULL! | #NULL! | 2.000 | 1.00 | 2.00 | 3.00 | 1.00 | 2.00 | 1.00 | 2.00 | 3.00 |
| #NULL! | 19.00  | 1.000 | 1.00 | 1.00 | 2.00 | 2.00 | 2.00 | 1.00 | 3.00 | 2.00 |
| 1.00   | 18.00  | 3.000 | 2.00 | 3.00 | 2.00 | 1.00 | 1.00 | 1.00 | 1.00 | 2.00 |
| 2.00   | 19.00  | 3.000 | 2.00 | 2.00 | 2.00 | 1.00 | 2.00 | 3.00 | 3.00 | 2.00 |
| 2.00   | 20.00  | 1.000 | 1.00 | 2.00 | 3.00 | 2.00 | 1.00 | 1.00 | 1.00 | 1.00 |
| 2.00   | 19.00  | 4.000 | 3.00 | 2.00 | 2.00 | 4.00 | 4.00 | 2.00 | 2.00 | 3.00 |
| 1.00   | 19.00  | 2.000 | 3.00 | 4.00 | 3.00 | 2.00 | 3.00 | 2.00 | 2.00 | 2.00 |
| 2.00   | 19.00  | 2.000 | 1.00 | 2.00 | 2.00 | 1.00 | 2.00 | 1.00 | 1.00 | 2.00 |
| 1.00   | 21.00  | 2.000 | 2.00 | 1.00 | 3.00 | 2.00 | 1.00 | 2.00 | 1.00 | 2.00 |
| 2.00   | 22.00  | 1.000 | 2.00 | 2.00 | 1.00 | 2.00 | 1.00 | 1.00 | 2.00 | 2.00 |
| 2.00   | 20.00  | 2.000 | 4.00 | 2.00 | 2.00 | 2.00 | 2.00 | 2.00 | 1.00 | 1.00 |
| #NULL! | #NULL! | 1.000 | 1.00 | 2.00 | 2.00 | 1.00 | 1.00 | 1.00 | 2.00 | 2.00 |
| #NULL! | #NULL! | 1.000 | 1.00 | 2.00 | 1.00 | 3.00 | 1.00 | 1.00 | 1.00 | 1.00 |
| #NULL! | #NULL! | 2.000 | 2.00 | 1.00 | 1.00 | 1.00 | 1.00 | 2.00 | 1.00 | 3.00 |
| #NULL! | 21.00  | 1.000 | 2.00 | 3.00 | 4.00 | 3.00 | 2.00 | 1.00 | 1.00 | 1.00 |
| #NULL! | #NULL! | 1.000 | 1.00 | 2.00 | 2.00 | 2.00 | 1.00 | 3.00 | 3.00 | 3.00 |
| #NULL! | #NULL! | 2.000 | 1.00 | 2.00 | 1.00 | 2.00 | 1.00 | 2.00 | 1.00 | 2.00 |
| #NULL! | #NULL! | 1.000 | 1.00 | 1.00 | 1.00 | 1.00 | 2.00 | 3.00 | 3.00 | 2.00 |
| #NULL! | #NULL! | 2.000 | 2.00 | 2.00 | 2.00 | 2.00 | 1.00 | 1.00 | 1.00 | 1.00 |
| 2.00   | 18.00  | 1.000 | 2.00 | 1.00 | 1.00 | 2.00 | 1.00 | 2.00 | 3.00 | 1.00 |
| 2.00   | 20.00  | 2.000 | 1.00 | 1.00 | 1.00 | 2.00 | 1.00 | 2.00 | 1.00 | 2.00 |
| 1.00   | 21.00  | 2.000 | 2.00 | 1.00 | 2.00 | 1.00 | 1.00 | 2.00 | 1.00 | 2.00 |
| 1.00   | 21.00  | 2.000 | 2.00 | 3.00 | 3.00 | 3.00 | 1.00 | 3.00 | 2.00 | 2.00 |
| 1.00   | 20.00  | 2.000 | 4.00 | 4.00 | 4.00 | 4.00 | 2.00 | 3.00 | 3.00 | 2.00 |
| 1.00   | 19.00  | 3.000 | 2.00 | 3.00 | 2.00 | 3.00 | 2.00 | 3.00 | 3.00 | 3.00 |
| 2.00   | 19.00  | 2.000 | 2.00 | 2.00 | 3.00 | 3.00 | 4.00 | 5.00 | 1.00 | 1.00 |
| 1.00   | 21.00  | 2.000 | 2.00 | 3.00 | 2.00 | 3.00 | 3.00 | 3.00 | 3.00 | 2.00 |
| 1.00   | 19.00  | 3.000 | 1.00 | 4.00 | 1.00 | 2.00 | 2.00 | 5.00 | 5.00 | 4.00 |
| 1.00   | 19.00  | 1.000 | 2.00 | 3.00 | 1.00 | 2.00 | 2.00 | 3.00 | 2.00 | 1.00 |
| 1.00   | 20.00  | 4.000 | 4.00 | 4.00 | 5.00 | 5.00 | 2.00 | 5.00 | 5.00 | 2.00 |
| 1.00   | 21.00  | 2.000 | 1.00 | 4.00 | 2.00 | 3.00 | 2.00 | 3.00 | 3.00 | 3.00 |

|        |        |       |      |      |      |      |      |      |      |      |
|--------|--------|-------|------|------|------|------|------|------|------|------|
| #NULL! | #NULL! | 2.000 | 2.00 | 3.00 | 2.00 | 2.00 | 2.00 | 1.00 | 1.00 | 2.00 |
| #NULL! | #NULL! | 2.000 | 1.00 | 3.00 | 1.00 | 2.00 | 2.00 | 3.00 | 1.00 | 2.00 |
| #NULL! | #NULL! | 1.000 | 1.00 | 3.00 | 1.00 | 2.00 | 3.00 | 1.00 | 3.00 | 3.00 |
| #NULL! | #NULL! | 1.000 | 1.00 | 3.00 | 1.00 | 2.00 | 2.00 | 3.00 | 1.00 | 2.00 |
| 1.00   | 18.00  | 1.000 | 2.00 | 1.00 | 1.00 | 3.00 | 2.00 | 2.00 | 1.00 | 2.00 |
| 2.00   | 20.00  | 5.000 | 5.00 | 4.00 | 2.00 | 2.00 | 3.00 | 2.00 | 2.00 | 2.00 |
| #NULL! | #NULL! | 2.000 | 2.00 | 2.00 | 2.00 | 1.00 | 1.00 | 3.00 | 2.00 | 2.00 |
| 2.00   | #NULL! | 3.000 | 3.00 | 2.00 | 3.00 | 2.00 | 3.00 | 2.00 | 2.00 | 3.00 |
| 2.00   | 19.00  | 3.000 | 1.00 | 3.00 | 2.00 | 2.00 | 1.00 | 3.00 | 3.00 | 2.00 |
| 1.00   | 19.00  | 2.000 | 2.00 | 2.00 | 2.00 | 2.00 | 3.00 | 3.00 | 2.00 | 3.00 |
| 2.00   | 19.00  | 2.000 | 2.00 | 2.00 | 3.00 | 3.00 | 2.00 | 3.00 | 2.00 | 2.00 |
| 1.00   | 21.00  | 4.000 | 3.00 | 2.00 | 1.00 | 2.00 | 3.00 | 4.00 | 5.00 | 4.00 |
| 1.00   | 20.00  | 4.000 | 3.00 | 2.00 | 1.00 | 1.00 | 2.00 | 2.00 | 3.00 | 2.00 |
| 1.00   | 19.00  | 1.000 | 2.00 | 1.00 | 2.00 | 3.00 | 3.00 | 2.00 | 3.00 | 2.00 |
| 1.00   | 20.00  | 2.000 | 2.00 | 2.00 | 1.00 | 1.00 | 1.00 | 1.00 | 3.00 | 2.00 |
| 1.00   | 20.00  | 3.000 | 4.00 | 4.00 | 2.00 | 3.00 | 2.00 | 2.00 | 3.00 | 2.00 |
| 2.00   | 19.00  | 4.000 | 4.00 | 3.00 | 3.00 | 3.00 | 4.00 | 3.00 | 4.00 | 3.00 |
| 2.00   | 19.00  | 2.000 | 2.00 | 1.00 | 5.00 | 5.00 | 1.00 | 2.00 | 2.00 | 2.00 |
| 2.00   | 20.00  | 1.000 | 2.00 | 2.00 | 1.00 | 3.00 | 1.00 | 1.00 | 3.00 | 1.00 |
| 2.00   | 20.00  | 2.000 | 2.00 | 3.00 | 1.00 | 4.00 | 1.00 | 5.00 | 2.00 | 1.00 |
| 1.00   | 22.00  | 1.000 | 1.00 | 1.00 | 1.00 | 1.00 | 1.00 | 2.00 | 3.00 | 2.00 |
| #NULL! | #NULL! | 3.000 | 3.00 | 3.00 | 1.00 | 1.00 | 1.00 | 2.00 | 2.00 | 2.00 |
| #NULL! | #NULL! | 1.000 | 1.00 | 1.00 | 1.00 | 1.00 | 2.00 | 3.00 | 4.00 | 5.00 |
| #NULL! | #NULL! | 2.000 | 1.00 | 1.00 | 1.00 | 1.00 | 2.00 | 5.00 | 5.00 | 3.00 |
| #NULL! | #NULL! | 2.000 | 2.00 | 1.00 | 1.00 | 2.00 | 1.00 | 1.00 | 2.00 | 1.00 |
| 1.00   | 20.00  | 2.000 | 2.00 | 2.00 | 2.00 | 1.00 | 1.00 | 3.00 | 5.00 | 5.00 |
| 2.00   | 22.00  | 3.000 | 2.00 | 1.00 | 2.00 | 1.00 | 3.00 | 4.00 | 1.00 | 1.00 |
| 1.00   | 20.00  | 4.000 | 5.00 | 2.00 | 1.00 | 5.00 | 4.00 | 4.00 | 2.00 | 1.00 |
| 1.00   | 20.00  | 2.000 | 2.00 | 3.00 | 3.00 | 2.00 | 1.00 | 2.00 | 1.00 | 2.00 |
| 1.00   | 19.00  | 2.000 | 2.00 | 2.00 | 2.00 | 3.00 | 1.00 | 1.00 | 2.00 | 2.00 |
| 1.00   | 30.00  | 4.000 | 4.00 | 3.00 | 2.00 | 4.00 | 1.00 | 1.00 | 1.00 | 3.00 |
| 2.00   | 19.00  | 4.000 | 5.00 | 3.00 | 4.00 | 3.00 | 2.00 | 3.00 | 4.00 | 3.00 |
| 2.00   | 19.00  | 2.000 | 2.00 | 2.00 | 2.00 | 3.00 | 3.00 | 3.00 | 3.00 | 2.00 |
| 2.00   | 19.00  | 5.000 | 4.00 | 3.00 | 4.00 | 2.00 | 2.00 | 2.00 | 3.00 | 3.00 |
| 2.00   | 19.00  | 5.000 | 4.00 | 2.00 | 2.00 | 2.00 | 2.00 | 2.00 | 3.00 | 3.00 |
| 2.00   | 19.00  | 4.000 | 5.00 | 5.00 | 5.00 | 4.00 | 1.00 | 3.00 | 2.00 | 2.00 |
| 2.00   | 20.00  | 1.000 | 2.00 | 1.00 | 1.00 | 1.00 | 4.00 | 3.00 | 2.00 | 1.00 |

|        |        |       |      |      |      |      |      |      |      |      |
|--------|--------|-------|------|------|------|------|------|------|------|------|
| 2.00   | #NULL! | 2.000 | 1.00 | 2.00 | 1.00 | 1.00 | 1.00 | 1.00 | 1.00 | 2.00 |
| 2.00   | 18.00  | 1.000 | 2.00 | 2.00 | 4.00 | 4.00 | 2.00 | 4.00 | 1.00 | 2.00 |
| 2.00   | 19.00  | 3.000 | 3.00 | 2.00 | 2.00 | 1.00 | 2.00 | 1.00 | 1.00 | 4.00 |
| 2.00   | 20.00  | 1.000 | 2.00 | 1.00 | 2.00 | 2.00 | 2.00 | 1.00 | 1.00 | 1.00 |
| 2.00   | #NULL! | 3.000 | 3.00 | 3.00 | 3.00 | 1.00 | 2.00 | 2.00 | 2.00 | 1.00 |
| 2.00   | 20.00  | 3.000 | 2.00 | 2.00 | 2.00 | 2.00 | 3.00 | 4.00 | 4.00 | 3.00 |
| 2.00   | 19.00  | 2.000 | 3.00 | 2.00 | 3.00 | 3.00 | 4.00 | 3.00 | 3.00 | 2.00 |
| 2.00   | 21.00  | 4.000 | 3.00 | 2.00 | 2.00 | 2.00 | 3.00 | 3.00 | 3.00 | 2.00 |
| 1.00   | 24.00  | 2.000 | 3.00 | 2.00 | 2.00 | 1.00 | 1.00 | 2.00 | 2.00 | 2.00 |
| 1.00   | 19.00  | 5.000 | 4.00 | 3.00 | 4.00 | 3.00 | 5.00 | 4.00 | 3.00 | 4.00 |
| #NULL! | #NULL! | 5.000 | 5.00 | 4.00 | 2.00 | 3.00 | 2.00 | 3.00 | 4.00 | 3.00 |
| 1.00   | 19.00  | 1.000 | 2.00 | 1.00 | 2.00 | 1.00 | 1.00 | 2.00 | 3.00 | 1.00 |
| 2.00   | 20.00  | 5.000 | 5.00 | 5.00 | 2.00 | 2.00 | 2.00 | 3.00 | 3.00 | 1.00 |
| #NULL! | 21.00  | 4.000 | 4.00 | 3.00 | 3.00 | 2.00 | 2.00 | 5.00 | 3.00 | 2.00 |
| 1.00   | #NULL! | 5.000 | 5.00 | 5.00 | 3.00 | 3.00 | 4.00 | 4.00 | 4.00 | 3.00 |
| 2.00   | 21.00  | 1.000 | 1.00 | 2.00 | 1.00 | 3.00 | 2.00 | 1.00 | 1.00 | 2.00 |
| 2.00   | 20.00  | 1.000 | 1.00 | 2.00 | 1.00 | 2.00 | 5.00 | 4.00 | 5.00 | 1.00 |
| 1.00   | 20.00  | 2.000 | 4.00 | 2.00 | 1.00 | 3.00 | 4.00 | 1.00 | 2.00 | 3.00 |
| 1.00   | 20.00  | 3.000 | 4.00 | 2.00 | 1.00 | 1.00 | 1.00 | 1.00 | 2.00 | 1.00 |
| 1.00   | 19.00  | 2.000 | 2.00 | 1.00 | 2.00 | 1.00 | 1.00 | 2.00 | 2.00 | 1.00 |
| 2.00   | 20.00  | 1.000 | 1.00 | 2.00 | 1.00 | 2.00 | 2.00 | 1.00 | 2.00 | 1.00 |
| 2.00   | 21.00  | 1.000 | 2.00 | 1.00 | 3.00 | 3.00 | 2.00 | 2.00 | 1.00 | 1.00 |
| 1.00   | 19.00  | 2.000 | 1.00 | 2.00 | 2.00 | 1.00 | 3.00 | 2.00 | 1.00 | 2.00 |
| 1.00   | #NULL! | 2.000 | 2.00 | 1.00 | 1.00 | 1.00 | 2.00 | 2.00 | 2.00 | 2.00 |
| 2.00   | 20.00  | 1.000 | 2.00 | 2.00 | 1.00 | 1.00 | 3.00 | 4.00 | 3.00 | 2.00 |
| 2.00   | 23.00  | 2.000 | 1.00 | 2.00 | 4.00 | 2.00 | 2.00 | 2.00 | 3.00 | 3.00 |
| 1.00   | 19.00  | 2.000 | 2.00 | 2.00 | 2.00 | 3.00 | 3.00 | 2.00 | 2.00 | 3.00 |
| 1.00   | 19.00  | 1.000 | 1.00 | 1.00 | 1.00 | 1.00 | 2.00 | 2.00 | 3.00 | 5.00 |
| 1.00   | 20.00  | 2.000 | 3.00 | 2.00 | 2.00 | 2.00 | 2.00 | 3.00 | 4.00 | 2.00 |
| 1.00   | #NULL! | 3.000 | 3.00 | 4.00 | 2.00 | 1.00 | 2.00 | 2.00 | 2.00 | 3.00 |
| 2.00   | 20.00  | 2.000 | 3.00 | 2.00 | 1.00 | 3.00 | 2.00 | 2.00 | 2.00 | 2.00 |
| 1.00   | #NULL! | 3.000 | 3.00 | 2.00 | 1.00 | 1.00 | 2.00 | 2.00 | 1.00 | 2.00 |
| 2.00   | 19.00  | 2.000 | 2.00 | 1.00 | 2.00 | 1.00 | 1.00 | 2.00 | 1.00 | 2.00 |
| #NULL! | #NULL! | 2.000 | 3.00 | 4.00 | 5.00 | 3.00 | 3.00 | 2.00 | 2.00 | 2.00 |
| 2.00   | 19.00  | 1.000 | 1.00 | 1.00 | 2.00 | 1.00 | 2.00 | 1.00 | 2.00 | 1.00 |
| 2.00   | 20.00  | 2.000 | 1.00 | 2.00 | 2.00 | 1.00 | 2.00 | 1.00 | 2.00 | 2.00 |
| 2.00   | 20.00  | 2.000 | 2.00 | 1.00 | 2.00 | 1.00 | 1.00 | 2.00 | 3.00 | 1.00 |

|        |        |       |      |      |      |      |      |      |      |      |
|--------|--------|-------|------|------|------|------|------|------|------|------|
| 2.00   | 21.00  | 1.000 | 4.00 | 2.00 | 3.00 | 1.00 | 3.00 | 1.00 | 2.00 | 1.00 |
| 2.00   | 20.00  | 1.000 | 2.00 | 2.00 | 2.00 | 1.00 | 1.00 | 5.00 | 5.00 | 5.00 |
| 1.00   | 22.00  | 1.000 | 1.00 | 2.00 | 5.00 | 5.00 | 5.00 | 2.00 | 2.00 | 1.00 |
| 1.00   | 18.00  | 1.000 | 1.00 | 1.00 | 2.00 | 1.00 | 1.00 | 1.00 | 2.00 | 1.00 |
| 1.00   | 23.00  | 2.000 | 3.00 | 4.00 | 1.00 | 1.00 | 1.00 | 2.00 | 3.00 | 3.00 |
| #NULL! | 19.00  | 1.000 | 2.00 | 3.00 | 4.00 | 3.00 | 2.00 | 1.00 | 2.00 | 3.00 |
| 1.00   | 18.00  | 1.000 | 1.00 | 1.00 | 1.00 | 1.00 | 2.00 | 2.00 | 2.00 | 3.00 |
| 2.00   | 20.00  | 1.000 | 1.00 | 2.00 | 2.00 | 1.00 | 1.00 | 1.00 | 3.00 | 3.00 |
| #NULL! | #NULL! | 5.000 | 5.00 | 5.00 | 5.00 | 5.00 | 5.00 | 5.00 | 5.00 | 5.00 |
| 1.00   | 20.00  | 1.000 | 1.00 | 2.00 | 1.00 | 2.00 | 2.00 | 1.00 | 2.00 | 1.00 |
| 1.00   | 19.00  | 1.000 | 1.00 | 2.00 | 1.00 | 2.00 | 1.00 | 1.00 | 2.00 | 1.00 |
| 2.00   | 21.00  | 1.000 | 1.00 | 3.00 | 3.00 | 2.00 | 2.00 | 2.00 | 3.00 | 1.00 |
| 1.00   | 20.00  | 1.000 | 1.00 | 1.00 | 2.00 | 2.00 | 1.00 | 2.00 | 2.00 | 3.00 |
| 1.00   | 19.00  | 1.000 | 1.00 | 1.00 | 1.00 | 1.00 | 2.00 | 3.00 | 3.00 | 3.00 |
| #NULL! | #NULL! | 1.000 | 1.00 | 1.00 | 1.00 | 1.00 | 1.00 | 1.00 | 1.00 | 1.00 |
| 1.00   | 18.00  | 4.000 | 3.00 | 2.00 | 1.00 | 2.00 | 2.00 | 1.00 | 2.00 | 1.00 |
| #NULL! | #NULL! | 2.000 | 2.00 | 2.00 | 2.00 | 2.00 | 2.00 | 2.00 | 2.00 | 2.00 |
| 2.00   | 20.00  | 2.000 | 2.00 | 1.00 | 2.00 | 1.00 | 1.00 | 2.00 | 1.00 | 2.00 |
| 1.00   | 19.00  | 2.000 | 2.00 | 2.00 | 2.00 | 3.00 | 2.00 | 2.00 | 1.00 | 4.00 |
| 2.00   | 22.00  | 3.000 | 2.00 | 4.00 | 3.00 | 4.00 | 2.00 | 4.00 | 1.00 | 3.00 |
| 2.00   | 19.00  | 1.000 | 2.00 | 3.00 | 3.00 | 2.00 | 2.00 | 4.00 | 1.00 | 5.00 |
| 2.00   | 18.00  | 5.000 | 5.00 | 5.00 | 5.00 | 5.00 | 5.00 | 5.00 | 5.00 | 5.00 |
| 1.00   | 20.00  | 2.000 | 3.00 | 2.00 | 2.00 | 3.00 | 3.00 | 3.00 | 2.00 | 3.00 |
| 1.00   | 21.00  | 2.000 | 3.00 | 2.00 | 2.00 | 2.00 | 2.00 | 1.00 | 2.00 | 2.00 |
| 1.00   | 17.00  | 2.000 | 1.00 | 1.00 | 2.00 | 1.00 | 2.00 | 1.00 | 2.00 | 1.00 |

| q10  | q11  | q12  | q13  | q14  | q15  | q16  | q17  | q18  | q19  | q20  |      |
|------|------|------|------|------|------|------|------|------|------|------|------|
| 1.00 | 1.00 | 1.00 | 1.00 | 2.00 | 2.00 | 2.00 | 1.00 | 1.00 | 1.00 | 1.00 | 5.00 |
| 2.00 | 2.00 | 2.00 | 2.00 | 2.00 | 4.00 | 2.00 | 2.00 | 2.00 | 2.00 | 2.00 | 3.00 |
| 1.00 | 2.00 | 5.00 | 3.00 | 5.00 | 5.00 | 4.00 | 3.00 | 2.00 | 2.00 | 2.00 | 2.00 |
| 1.00 | 3.00 | 1.00 | 1.00 | 5.00 | 1.00 | 1.00 | 4.00 | 3.00 | 3.00 | 3.00 | 1.00 |
| 1.00 | 3.00 | 2.00 | 1.00 | 2.00 | 1.00 | 2.00 | 1.00 | 2.00 | 1.00 | 2.00 | 2.00 |
| 3.00 | 3.00 | 1.00 | 1.00 | 4.00 | 3.00 | 3.00 | 4.00 | 3.00 | 2.00 | 1.00 | 1.00 |
| 2.00 | 2.00 | 1.00 | 1.00 | 4.00 | 3.00 | 2.00 | 2.00 | 2.00 | 4.00 | 1.00 | 1.00 |
| 3.00 | 3.00 | 3.00 | 2.00 | 4.00 | 2.00 | 3.00 | 3.00 | 1.00 | 1.00 | 1.00 | 1.00 |
| 2.00 | 4.00 | 0.00 | 2.00 | 2.00 | 2.00 | 2.00 | 3.00 | 4.00 | 2.00 | 2.00 | 2.00 |
| 2.00 | 2.00 | 1.00 | 1.00 | 3.00 | 4.00 | 2.00 | 2.00 | 2.00 | 3.00 | 3.00 | 3.00 |
| 2.00 | 2.00 | 4.00 | 2.00 | 5.00 | 2.00 | 2.00 | 2.00 | 1.00 | 3.00 | 4.00 | 4.00 |
| 1.00 | 1.00 | 1.00 | 1.00 | 2.00 | 1.00 | 1.00 | 1.00 | 2.00 | 1.00 | 1.00 | 1.00 |
| 2.00 | 2.00 | 1.00 | 1.00 | 5.00 | 2.00 | 1.00 | 3.00 | 4.00 | 1.00 | 5.00 | 5.00 |
| 2.00 | 1.00 | 2.00 | 1.00 | 1.00 | 1.00 | 2.00 | 2.00 | 5.00 | 3.00 | 1.00 | 1.00 |
| 2.00 | 3.00 | 2.00 | 2.00 | 3.00 | 3.00 | 2.00 | 2.00 | 3.00 | 2.00 | 2.00 | 2.00 |
| 2.00 | 4.00 | 1.00 | 1.00 | 2.00 | 2.00 | 4.00 | 4.00 | 4.00 | 2.00 | 1.00 | 1.00 |
| 3.00 | 3.00 | 1.00 | 1.00 | 1.00 | 2.00 | 2.00 | 2.00 | 1.00 | 1.00 | 1.00 | 1.00 |
| 2.00 | 2.00 | 1.00 | 1.00 | 3.00 | 2.00 | 2.00 | 2.00 | 2.00 | 2.00 | 2.00 | 2.00 |
| 3.00 | 2.00 | 2.00 | 2.00 | 3.00 | 2.00 | 2.00 | 1.00 | 2.00 | 3.00 | 2.00 | 2.00 |
| 3.00 | 2.00 | 2.00 | 2.00 | 3.00 | 2.00 | 2.00 | 1.00 | 3.00 | 2.00 | 2.00 | 2.00 |
| 1.00 | 1.00 | 1.00 | 2.00 | 2.00 | 2.00 | 1.00 | 1.00 | 1.00 | 1.00 | 1.00 | 2.00 |
| 3.00 | 3.00 | 1.00 | 1.00 | 4.00 | 4.00 | 2.00 | 2.00 | 4.00 | 5.00 | 1.00 | 1.00 |
| 2.00 | 3.00 | 1.00 | 1.00 | 2.00 | 1.00 | 2.00 | 2.00 | 3.00 | 2.00 | 1.00 | 1.00 |
| 1.00 | 1.00 | 1.00 | 1.00 | 2.00 | 2.00 | 1.00 | 1.00 | 1.00 | 1.00 | 1.00 | 2.00 |
| 2.00 | 3.00 | 3.00 | 3.00 | 3.00 | 2.00 | 3.00 | 2.00 | 4.00 | 2.00 | 3.00 | 3.00 |
| 1.00 | 1.00 | 1.00 | 3.00 | 3.00 | 1.00 | 2.00 | 2.00 | 2.00 | 3.00 | 2.00 | 2.00 |
| 3.00 | 3.00 | 2.00 | 2.00 | 3.00 | 3.00 | 3.00 | 2.00 | 3.00 | 3.00 | 2.00 | 2.00 |
| 1.00 | 1.00 | 4.00 | 4.00 | 4.00 | 1.00 | 1.00 | 1.00 | 1.00 | 2.00 | 1.00 | 1.00 |
| 3.00 | 3.00 | 1.00 | 1.00 | 4.00 | 1.00 | 1.00 | 1.00 | 1.00 | 1.00 | 1.00 | 1.00 |
| 3.00 | 5.00 | 1.00 | 1.00 | 5.00 | 3.00 | 1.00 | 1.00 | 5.00 | 5.00 | 1.00 | 1.00 |
| 1.00 | 1.00 | 1.00 | 1.00 | 5.00 | 3.00 | 2.00 | 2.00 | 2.00 | 2.00 | 1.00 | 1.00 |
| 3.00 | 1.00 | 1.00 | 1.00 | 3.00 | 1.00 | 1.00 | 1.00 | 1.00 | 1.00 | 1.00 | 1.00 |
| 2.00 | 3.00 | 1.00 | 1.00 | 2.00 | 2.00 | 3.00 | 4.00 | 2.00 | 1.00 | 2.00 | 2.00 |
| 3.00 | 3.00 | 2.00 | 2.00 | 4.00 | 2.00 | 2.00 | 3.00 | 2.00 | 2.00 | 2.00 | 2.00 |
| 2.00 | 2.00 | 2.00 | 1.00 | 3.00 | 2.00 | 3.00 | 2.00 | 2.00 | 3.00 | 2.00 | 2.00 |
| 4.00 | 1.00 | 1.00 | 1.00 | 4.00 | 4.00 | 2.00 | 2.00 | 3.00 | 3.00 | 1.00 | 1.00 |



|      |      |      |      |      |      |      |        |      |      |      |
|------|------|------|------|------|------|------|--------|------|------|------|
| 2.00 | 2.00 | 1.00 | 1.00 | 4.00 | 2.00 | 2.00 | 2.00   | 3.00 | 3.00 | 1.00 |
| 2.00 | 2.00 | 1.00 | 1.00 | 4.00 | 2.00 | 2.00 | 2.00   | 3.00 | 3.00 | 1.00 |
| 2.00 | 2.00 | 1.00 | 1.00 | 3.00 | 2.00 | 2.00 | 1.00   | 4.00 | 1.00 | 3.00 |
| 1.00 | 1.00 | 1.00 | 1.00 | 4.00 | 2.00 | 1.00 | 2.00   | 3.00 | 2.00 | 1.00 |
| 4.00 | 4.00 | 4.00 | 4.00 | 1.00 | 1.00 | 1.00 | 1.00   | 5.00 | 5.00 | 2.00 |
| 4.00 | 4.00 | 1.00 | 1.00 | 3.00 | 2.00 | 2.00 | 2.00   | 3.00 | 3.00 | 2.00 |
| 2.00 | 2.00 | 2.00 | 1.00 | 4.00 | 3.00 | 2.00 | 2.00   | 2.00 | 3.00 | 3.00 |
| 4.00 | 4.00 | 1.00 | 1.00 | 4.00 | 1.00 | 1.00 | 2.00   | 2.00 | 3.00 | 4.00 |
| 3.00 | 2.00 | 1.00 | 1.00 | 5.00 | 2.00 | 4.00 | 4.00   | 3.00 | 4.00 | 2.00 |
| 2.00 | 2.00 | 1.00 | 1.00 | 5.00 | 2.00 | 2.00 | 2.00   | 5.00 | 1.00 | 1.00 |
| 3.00 | 1.00 | 1.00 | 1.00 | 5.00 | 2.00 | 1.00 | 1.00   | 3.00 | 2.00 | 1.00 |
| 2.00 | 2.00 | 1.00 | 1.00 | 4.00 | 2.00 | 2.00 | 4.00   | 3.00 | 4.00 | 2.00 |
| 2.00 | 2.00 | 1.00 | 1.00 | 3.00 | 2.00 | 2.00 | 2.00   | 5.00 | 1.00 | 3.00 |
| 3.00 | 2.00 | 1.00 | 1.00 | 1.00 | 2.00 | 3.00 | 4.00   | 3.00 | 2.00 | 1.00 |
| 1.00 | 3.00 | 1.00 | 1.00 | 4.00 | 1.00 | 2.00 | 1.00   | 2.00 | 2.00 | 1.00 |
| 1.00 | 3.00 | 1.00 | 1.00 | 4.00 | 1.00 | 2.00 | 1.00   | 3.00 | 3.00 | 1.00 |
| 1.00 | 1.00 | 1.00 | 2.00 | 1.00 | 2.00 | 2.00 | 2.00   | 1.00 | 1.00 | 1.00 |
| 4.00 | 3.00 | 4.00 | 4.00 | 4.00 | 3.00 | 4.00 | 4.00   | 4.00 | 3.00 | 3.00 |
| 1.00 | 3.00 | 1.00 | 1.00 | 4.00 | 1.00 | 2.00 | 1.00   | 3.00 | 3.00 | 1.00 |
| 1.00 | 3.00 | 1.00 | 1.00 | 4.00 | 1.00 | 2.00 | 1.00   | 3.00 | 3.00 | 1.00 |
| 2.00 | 1.00 | 1.00 | 1.00 | 3.00 | 2.00 | 2.00 | 2.00   | 2.00 | 2.00 | 2.00 |
| 1.00 | 1.00 | 1.00 | 1.00 | 1.00 | 5.00 | 5.00 | 5.00   | 4.00 | 5.00 | 5.00 |
| 2.00 | 2.00 | 1.00 | 1.00 | 2.00 | 1.00 | 1.00 | 1.00   | 2.00 | 2.00 | 1.00 |
| 4.00 | 3.00 | 1.00 | 1.00 | 5.00 | 3.00 | 2.00 | 2.00   | 1.00 | 2.00 | 1.00 |
| 1.00 | 2.00 | 1.00 | 1.00 | 2.00 | 1.00 | 1.00 | 1.00   | 2.00 | 1.00 | 1.00 |
| 3.00 | 3.00 | 1.00 | 1.00 | 5.00 | 3.00 | 2.00 | #NULL! | 1.00 | 2.00 | 1.00 |
| 1.00 | 3.00 | 1.00 | 1.00 | 4.00 | 1.00 | 2.00 | 1.00   | 3.00 | 3.00 | 1.00 |
| 1.00 | 3.00 | 1.00 | 1.00 | 4.00 | 1.00 | 2.00 | 1.00   | 3.00 | 3.00 | 1.00 |
| 3.00 | 3.00 | 3.00 | 2.00 | 2.00 | 2.00 | 2.00 | 2.00   | 2.00 | 2.00 | 2.00 |
| 1.00 | 3.00 | 1.00 | 1.00 | 1.00 | 2.00 | 2.00 | 2.00   | 1.00 | 1.00 | 1.00 |
| 1.00 | 1.00 | 1.00 | 1.00 | 1.00 | 2.00 | 2.00 | 2.00   | 1.00 | 1.00 | 1.00 |
| 2.00 | 2.00 | 2.00 | 2.00 | 2.00 | 2.00 | 2.00 | 2.00   | 2.00 | 2.00 | 2.00 |
| 1.00 | 2.00 | 2.00 | 2.00 | 1.00 | 1.00 | 2.00 | 2.00   | 2.00 | 1.00 | 1.00 |
| 1.00 | 1.00 | 1.00 | 1.00 | 1.00 | 1.00 | 1.00 | 2.00   | 1.00 | 1.00 | 1.00 |
| 1.00 | 1.00 | 2.00 | 1.00 | 1.00 | 1.00 | 1.00 | 1.00   | 1.00 | 5.00 | 1.00 |
| 1.00 | 3.00 | 4.00 | 3.00 | 1.00 | 3.00 | 3.00 | 5.00   | 2.00 | 1.00 | 5.00 |
| 2.00 | 2.00 | 1.00 | 2.00 | 1.00 | 2.00 | 2.00 | 1.00   | 2.00 | 1.00 | 1.00 |

|      |      |      |      |      |      |      |      |      |      |      |
|------|------|------|------|------|------|------|------|------|------|------|
| 1.00 | 1.00 | 1.00 | 2.00 | 2.00 | 2.00 | 2.00 | 2.00 | 1.00 | 1.00 | 1.00 |
| 2.00 | 2.00 | 1.00 | 1.00 | 1.00 | 2.00 | 2.00 | 2.00 | 2.00 | 1.00 | 1.00 |
| 2.00 | 1.00 | 2.00 | 1.00 | 1.00 | 2.00 | 1.00 | 2.00 | 2.00 | 1.00 | 2.00 |
| 4.00 | 2.00 | 1.00 | 1.00 | 2.00 | 1.00 | 1.00 | 2.00 | 1.00 | 1.00 | 1.00 |
| 3.00 | 1.00 | 3.00 | 2.00 | 4.00 | 3.00 | 2.00 | 4.00 | 3.00 | 2.00 | 4.00 |
| 2.00 | 3.00 | 4.00 | 3.00 | 2.00 | 3.00 | 4.00 | 2.00 | 1.00 | 2.00 | 2.00 |
| 4.00 | 2.00 | 4.00 | 3.00 | 2.00 | 1.00 | 3.00 | 4.00 | 5.00 | 3.00 | 2.00 |
| 1.00 | 2.00 | 3.00 | 5.00 | 1.00 | 1.00 | 1.00 | 3.00 | 4.00 | 2.00 | 5.00 |
| 3.00 | 1.00 | 3.00 | 1.00 | 1.00 | 2.00 | 5.00 | 3.00 | 1.00 | 2.00 | 1.00 |
| 2.00 | 1.00 | 2.00 | 2.00 | 1.00 | 2.00 | 1.00 | 2.00 | 1.00 | 1.00 | 2.00 |
| 2.00 | 1.00 | 2.00 | 1.00 | 1.00 | 1.00 | 2.00 | 1.00 | 2.00 | 1.00 | 2.00 |
| 2.00 | 1.00 | 2.00 | 1.00 | 1.00 | 2.00 | 1.00 | 2.00 | 1.00 | 2.00 | 1.00 |
| 1.00 | 2.00 | 1.00 | 1.00 | 1.00 | 1.00 | 2.00 | 1.00 | 2.00 | 3.00 | 2.00 |
| 2.00 | 1.00 | 1.00 | 2.00 | 1.00 | 2.00 | 1.00 | 2.00 | 1.00 | 2.00 | 1.00 |
| 2.00 | 1.00 | 2.00 | 2.00 | 1.00 | 2.00 | 2.00 | 1.00 | 2.00 | 1.00 | 2.00 |
| 1.00 | 2.00 | 1.00 | 1.00 | 2.00 | 2.00 | 1.00 | 1.00 | 1.00 | 2.00 | 2.00 |
| 3.00 | 3.00 | 2.00 | 2.00 | 1.00 | 1.00 | 1.00 | 2.00 | 2.00 | 2.00 | 3.00 |
| 1.00 | 2.00 | 1.00 | 1.00 | 1.00 | 2.00 | 1.00 | 2.00 | 1.00 | 2.00 | 2.00 |
| 2.00 | 2.00 | 2.00 | 1.00 | 2.00 | 3.00 | 2.00 | 2.00 | 3.00 | 2.00 | 2.00 |
| 2.00 | 2.00 | 3.00 | 3.00 | 3.00 | 2.00 | 3.00 | 2.00 | 2.00 | 2.00 | 2.00 |
| 2.00 | 3.00 | 2.00 | 2.00 | 2.00 | 2.00 | 2.00 | 3.00 | 1.00 | 2.00 | 2.00 |
| 1.00 | 2.00 | 2.00 | 1.00 | 1.00 | 2.00 | 2.00 | 1.00 | 2.00 | 1.00 | 2.00 |
| 1.00 | 1.00 | 1.00 | 1.00 | 4.00 | 4.00 | 5.00 | 2.00 | 1.00 | 4.00 | 1.00 |
| 3.00 | 2.00 | 1.00 | 1.00 | 5.00 | 4.00 | 3.00 | 3.00 | 3.00 | 4.00 | 4.00 |
| 1.00 | 1.00 | 2.00 | 1.00 | 3.00 | 5.00 | 5.00 | 1.00 | 1.00 | 1.00 | 1.00 |
| 2.00 | 2.00 | 1.00 | 1.00 | 2.00 | 2.00 | 2.00 | 1.00 | 1.00 | 1.00 | 1.00 |
| 1.00 | 2.00 | 1.00 | 1.00 | 2.00 | 2.00 | 1.00 | 2.00 | 1.00 | 2.00 | 2.00 |
| 3.00 | 1.00 | 2.00 | 1.00 | 1.00 | 1.00 | 1.00 | 1.00 | 2.00 | 3.00 | 5.00 |
| 1.00 | 2.00 | 1.00 | 5.00 | 5.00 | 5.00 | 5.00 | 5.00 | 5.00 | 5.00 | 5.00 |
| 1.00 | 2.00 | 1.00 | 1.00 | 1.00 | 1.00 | 1.00 | 1.00 | 1.00 | 1.00 | 2.00 |
| 1.00 | 2.00 | 2.00 | 1.00 | 1.00 | 2.00 | 1.00 | 2.00 | 2.00 | 1.00 | 2.00 |
| 3.00 | 4.00 | 4.00 | 2.00 | 4.00 | 4.00 | 2.00 | 3.00 | 2.00 | 3.00 | 2.00 |
| 3.00 | 3.00 | 1.00 | 1.00 | 3.00 | 1.00 | 3.00 | 1.00 | 1.00 | 1.00 | 1.00 |
| 2.00 | 1.00 | 1.00 | 2.00 | 1.00 | 1.00 | 1.00 | 2.00 | 2.00 | 2.00 | 1.00 |
| 3.00 | 4.00 | 1.00 | 4.00 | 2.00 | 2.00 | 2.00 | 2.00 | 2.00 | 2.00 | 2.00 |
| 3.00 | 3.00 | 1.00 | 1.00 | 3.00 | 2.00 | 2.00 | 1.00 | 3.00 | 3.00 | 1.00 |
| 4.00 | 3.00 | 1.00 | 1.00 | 3.00 | 2.00 | 2.00 | 3.00 | 3.00 | 2.00 | 2.00 |

|      |      |      |      |      |      |      |      |      |      |      |
|------|------|------|------|------|------|------|------|------|------|------|
| 2.00 | 1.00 | 2.00 | 1.00 | 1.00 | 2.00 | 2.00 | 1.00 | 2.00 | 2.00 | 1.00 |
| 3.00 | 2.00 | 1.00 | 2.00 | 1.00 | 1.00 | 2.00 | 1.00 | 2.00 | 2.00 | 1.00 |
| 3.00 | 1.00 | 2.00 | 1.00 | 1.00 | 1.00 | 1.00 | 2.00 | 2.00 | 3.00 | 1.00 |
| 3.00 | 3.00 | 1.00 | 1.00 | 1.00 | 1.00 | 2.00 | 1.00 | 2.00 | 3.00 | 2.00 |
| 5.00 | 2.00 | 2.00 | 2.00 | 1.00 | 2.00 | 3.00 | 4.00 | 3.00 | 2.00 | 2.00 |
| 1.00 | 1.00 | 2.00 | 3.00 | 1.00 | 1.00 | 2.00 | 2.00 | 1.00 | 1.00 | 2.00 |
| 2.00 | 2.00 | 1.00 | 3.00 | 2.00 | 1.00 | 3.00 | 2.00 | 1.00 | 2.00 | 1.00 |
| 1.00 | 2.00 | 3.00 | 1.00 | 1.00 | 1.00 | 1.00 | 3.00 | 2.00 | 3.00 | 2.00 |
| 1.00 | 2.00 | 3.00 | 2.00 | 2.00 | 1.00 | 2.00 | 1.00 | 1.00 | 2.00 | 1.00 |
| 3.00 | 2.00 | 1.00 | 1.00 | 4.00 | 2.00 | 1.00 | 1.00 | 5.00 | 2.00 | 1.00 |
| 2.00 | 2.00 | 2.00 | 2.00 | 2.00 | 1.00 | 2.00 | 1.00 | 1.00 | 2.00 | 2.00 |
| 3.00 | 2.00 | 1.00 | 1.00 | 5.00 | 3.00 | 2.00 | 2.00 | 2.00 | 2.00 | 3.00 |
| 1.00 | 2.00 | 2.00 | 2.00 | 2.00 | 3.00 | 2.00 | 2.00 | 2.00 | 3.00 | 2.00 |
| 1.00 | 1.00 | 2.00 | 1.00 | 2.00 | 2.00 | 1.00 | 1.00 | 2.00 | 1.00 | 2.00 |
| 1.00 | 2.00 | 1.00 | 2.00 | 1.00 | 1.00 | 2.00 | 1.00 | 2.00 | 1.00 | 2.00 |
| 1.00 | 1.00 | 2.00 | 1.00 | 1.00 | 2.00 | 1.00 | 2.00 | 1.00 | 2.00 | 1.00 |
| 3.00 | 1.00 | 1.00 | 1.00 | 1.00 | 1.00 | 1.00 | 2.00 | 2.00 | 2.00 | 2.00 |
| 2.00 | 1.00 | 1.00 | 1.00 | 2.00 | 2.00 | 2.00 | 2.00 | 3.00 | 1.00 | 1.00 |
| 2.00 | 1.00 | 1.00 | 2.00 | 2.00 | 1.00 | 3.00 | 2.00 | 2.00 | 1.00 | 1.00 |
| 3.00 | 5.00 | 5.00 | 5.00 | 1.00 | 2.00 | 2.00 | 3.00 | 2.00 | 2.00 | 3.00 |
| 1.00 | 2.00 | 1.00 | 2.00 | 1.00 | 1.00 | 1.00 | 1.00 | 2.00 | 2.00 | 2.00 |
| 3.00 | 2.00 | 1.00 | 1.00 | 1.00 | 1.00 | 2.00 | 2.00 | 2.00 | 1.00 | 1.00 |
| 1.00 | 1.00 | 2.00 | 1.00 | 1.00 | 1.00 | 1.00 | 1.00 | 1.00 | 1.00 | 1.00 |
| 2.00 | 1.00 | 1.00 | 1.00 | 1.00 | 2.00 | 2.00 | 1.00 | 2.00 | 1.00 | 2.00 |
| 1.00 | 3.00 | 2.00 | 2.00 | 2.00 | 2.00 | 1.00 | 1.00 | 1.00 | 1.00 | 2.00 |
| 2.00 | 1.00 | 2.00 | 1.00 | 2.00 | 3.00 | 2.00 | 1.00 | 1.00 | 2.00 | 3.00 |
| 2.00 | 2.00 | 3.00 | 5.00 | 1.00 | 1.00 | 1.00 | 1.00 | 1.00 | 1.00 | 3.00 |
| 2.00 | 1.00 | 2.00 | 1.00 | 1.00 | 2.00 | 1.00 | 1.00 | 2.00 | 1.00 | 1.00 |
| 3.00 | 2.00 | 1.00 | 1.00 | 2.00 | 2.00 | 1.00 | 2.00 | 3.00 | 2.00 | 2.00 |
| 3.00 | 3.00 | 3.00 | 1.00 | 5.00 | 2.00 | 4.00 | 3.00 | 5.00 | 2.00 | 2.00 |
| 3.00 | 3.00 | 2.00 | 3.00 | 2.00 | 2.00 | 3.00 | 3.00 | 5.00 | 2.00 | 2.00 |
| 3.00 | 4.00 | 5.00 | 5.00 | 5.00 | 2.00 | 2.00 | 3.00 | 1.00 | 1.00 | 1.00 |
| 3.00 | 4.00 | 1.00 | 1.00 | 4.00 | 2.00 | 2.00 | 2.00 | 3.00 | 2.00 | 2.00 |
| 2.00 | 4.00 | 1.00 | 1.00 | 4.00 | 2.00 | 1.00 | 2.00 | 3.00 | 1.00 | 1.00 |
| 1.00 | 2.00 | 1.00 | 1.00 | 2.00 | 2.00 | 1.00 | 1.00 | 1.00 | 2.00 | 2.00 |
| 2.00 | 3.00 | 1.00 | 1.00 | 5.00 | 2.00 | 2.00 | 4.00 | 2.00 | 2.00 | 2.00 |
| 2.00 | 4.00 | 1.00 | 2.00 | 4.00 | 5.00 | 2.00 | 1.00 | 4.00 | 1.00 | 1.00 |

|      |      |      |      |      |      |      |      |      |      |      |
|------|------|------|------|------|------|------|------|------|------|------|
| 2.00 | 2.00 | 1.00 | 1.00 | 4.00 | 2.00 | 2.00 | 2.00 | 2.00 | 2.00 | 2.00 |
| 1.00 | 2.00 | 4.00 | 4.00 | 1.00 | 2.00 | 2.00 | 3.00 | 4.00 | 4.00 | 1.00 |
| 2.00 | 2.00 | 4.00 | 4.00 | 1.00 | 2.00 | 2.00 | 3.00 | 4.00 | 4.00 | 1.00 |
| 1.00 | 2.00 | 4.00 | 4.00 | 1.00 | 2.00 | 2.00 | 3.00 | 4.00 | 4.00 | 1.00 |
| 1.00 | 1.00 | 2.00 | 1.00 | 1.00 | 2.00 | 1.00 | 2.00 | 1.00 | 2.00 | 1.00 |
| 2.00 | 2.00 | 1.00 | 1.00 | 2.00 | 3.00 | 2.00 | 2.00 | 1.00 | 2.00 | 1.00 |
| 2.00 | 2.00 | 2.00 | 1.00 | 5.00 | 1.00 | 2.00 | 2.00 | 5.00 | 2.00 | 1.00 |
| 3.00 | 3.00 | 3.00 | 3.00 | 4.00 | 2.00 | 2.00 | 2.00 | 3.00 | 3.00 | 2.00 |
| 1.00 | 2.00 | 2.00 | 3.00 | 3.00 | 2.00 | 3.00 | 2.00 | 2.00 | 2.00 | 2.00 |
| 2.00 | 3.00 | 2.00 | 2.00 | 3.00 | 2.00 | 3.00 | 2.00 | 2.00 | 2.00 | 2.00 |
| 3.00 | 2.00 | 2.00 | 2.00 | 4.00 | 3.00 | 2.00 | 2.00 | 2.00 | 2.00 | 2.00 |
| 3.00 | 3.00 | 4.00 | 1.00 | 4.00 | 4.00 | 3.00 | 3.00 | 1.00 | 4.00 | 4.00 |
| 1.00 | 2.00 | 1.00 | 1.00 | 2.00 | 1.00 | 2.00 | 1.00 | 3.00 | 1.00 | 2.00 |
| 4.00 | 2.00 | 1.00 | 5.00 | 2.00 | 3.00 | 2.00 | 2.00 | 3.00 | 2.00 | 4.00 |
| 2.00 | 1.00 | 3.00 | 4.00 | 3.00 | 2.00 | 2.00 | 3.00 | 2.00 | 2.00 | 2.00 |
| 2.00 | 2.00 | 2.00 | 2.00 | 4.00 | 2.00 | 3.00 | 2.00 | 2.00 | 2.00 | 2.00 |
| 2.00 | 2.00 | 1.00 | 1.00 | 5.00 | 5.00 | 3.00 | 3.00 | 3.00 | 3.00 | 3.00 |
| 1.00 | 1.00 | 5.00 | 5.00 | 1.00 | 2.00 | 5.00 | 5.00 | 5.00 | 1.00 | 1.00 |
| 1.00 | 3.00 | 1.00 | 1.00 | 3.00 | 2.00 | 2.00 | 2.00 | 2.00 | 2.00 | 2.00 |
| 5.00 | 2.00 | 1.00 | 1.00 | 5.00 | 1.00 | 1.00 | 1.00 | 3.00 | 3.00 | 3.00 |
| 2.00 | 2.00 | 1.00 | 1.00 | 2.00 | 1.00 | 2.00 | 3.00 | 2.00 | 1.00 | 1.00 |
| 4.00 | 4.00 | 4.00 | 1.00 | 3.00 | 1.00 | 3.00 | 1.00 | 3.00 | 1.00 | 2.00 |
| 4.00 | 3.00 | 2.00 | 1.00 | 1.00 | 2.00 | 3.00 | 2.00 | 1.00 | 3.00 | 2.00 |
| 2.00 | 1.00 | 1.00 | 1.00 | 1.00 | 2.00 | 1.00 | 2.00 | 1.00 | 2.00 | 3.00 |
| 2.00 | 3.00 | 3.00 | 5.00 | 1.00 | 2.00 | 3.00 | 4.00 | 5.00 | 4.00 | 3.00 |
| 4.00 | 3.00 | 2.00 | 1.00 | 1.00 | 2.00 | 1.00 | 2.00 | 1.00 | 2.00 | 1.00 |
| 2.00 | 1.00 | 3.00 | 1.00 | 4.00 | 5.00 | 2.00 | 1.00 | 1.00 | 1.00 | 1.00 |
| 2.00 | 2.00 | 1.00 | 1.00 | 4.00 | 2.00 | 3.00 | 4.00 | 1.00 | 2.00 | 2.00 |
| 2.00 | 2.00 | 1.00 | 1.00 | 4.00 | 2.00 | 2.00 | 2.00 | 1.00 | 2.00 | 2.00 |
| 3.00 | 4.00 | 1.00 | 1.00 | 5.00 | 4.00 | 2.00 | 2.00 | 1.00 | 1.00 | 1.00 |
| 1.00 | 2.00 | 1.00 | 1.00 | 4.00 | 1.00 | 1.00 | 1.00 | 1.00 | 1.00 | 1.00 |
| 3.00 | 5.00 | 2.00 | 2.00 | 4.00 | 2.00 | 2.00 | 2.00 | 2.00 | 2.00 | 2.00 |
| 3.00 | 2.00 | 2.00 | 1.00 | 3.00 | 2.00 | 2.00 | 1.00 | 1.00 | 1.00 | 2.00 |
| 2.00 | 4.00 | 4.00 | 2.00 | 4.00 | 4.00 | 2.00 | 2.00 | 2.00 | 2.00 | 2.00 |
| 2.00 | 4.00 | 1.00 | 1.00 | 5.00 | 2.00 | 1.00 | 1.00 | 1.00 | 1.00 | 1.00 |
| 3.00 | 3.00 | 2.00 | 2.00 | 4.00 | 3.00 | 2.00 | 2.00 | 3.00 | 3.00 | 2.00 |
| 1.00 | 1.00 | 2.00 | 2.00 | 2.00 | 1.00 | 1.00 | 1.00 | 2.00 | 2.00 | 2.00 |

|      |      |      |      |      |      |      |      |      |      |      |
|------|------|------|------|------|------|------|------|------|------|------|
| 2.00 | 1.00 | 1.00 | 1.00 | 2.00 | 2.00 | 1.00 | 1.00 | 1.00 | 1.00 | 3.00 |
| 4.00 | 2.00 | 1.00 | 1.00 | 1.00 | 3.00 | 2.00 | 2.00 | 1.00 | 1.00 | 4.00 |
| 4.00 | 1.00 | 1.00 | 1.00 | 2.00 | 2.00 | 2.00 | 1.00 | 1.00 | 1.00 | 1.00 |
| 1.00 | 1.00 | 1.00 | 5.00 | 3.00 | 2.00 | 2.00 | 1.00 | 1.00 | 2.00 | 1.00 |
| 1.00 | 1.00 | 1.00 | 2.00 | 1.00 | 2.00 | 3.00 | 3.00 | 3.00 | 2.00 | 2.00 |
| 3.00 | 4.00 | 1.00 | 1.00 | 4.00 | 2.00 | 3.00 | 3.00 | 2.00 | 2.00 | 2.00 |
| 2.00 | 1.00 | 2.00 | 2.00 | 4.00 | 4.00 | 3.00 | 2.00 | 2.00 | 2.00 | 2.00 |
| 3.00 | 3.00 | 1.00 | 1.00 | 4.00 | 2.00 | 3.00 | 3.00 | 2.00 | 2.00 | 2.00 |
| 2.00 | 1.00 | 2.00 | 2.00 | 4.00 | 2.00 | 2.00 | 2.00 | 3.00 | 2.00 | 2.00 |
| 3.00 | 3.00 | 3.00 | 3.00 | 4.00 | 3.00 | 4.00 | 4.00 | 5.00 | 3.00 | 4.00 |
| 4.00 | 5.00 | 2.00 | 2.00 | 5.00 | 2.00 | 1.00 | 2.00 | 3.00 | 2.00 | 4.00 |
| 1.00 | 2.00 | 1.00 | 1.00 | 1.00 | 1.00 | 2.00 | 1.00 | 1.00 | 2.00 | 1.00 |
| 2.00 | 2.00 | 1.00 | 1.00 | 5.00 | 2.00 | 2.00 | 2.00 | 2.00 | 2.00 | 2.00 |
| 2.00 | 2.00 | 5.00 | 2.00 | 4.00 | 2.00 | 2.00 | 4.00 | 2.00 | 2.00 | 2.00 |
| 3.00 | 4.00 | 4.00 | 2.00 | 5.00 | 2.00 | 2.00 | 2.00 | 2.00 | 2.00 | 2.00 |
| 1.00 | 2.00 | 2.00 | 3.00 | 2.00 | 1.00 | 2.00 | 1.00 | 2.00 | 2.00 | 1.00 |
| 1.00 | 1.00 | 2.00 | 1.00 | 1.00 | 2.00 | 1.00 | 2.00 | 3.00 | 5.00 | 1.00 |
| 2.00 | 2.00 | 2.00 | 1.00 | 3.00 | 3.00 | 2.00 | 1.00 | 1.00 | 1.00 | 1.00 |
| 2.00 | 2.00 | 1.00 | 1.00 | 2.00 | 1.00 | 1.00 | 1.00 | 1.00 | 1.00 | 1.00 |
| 2.00 | 1.00 | 2.00 | 1.00 | 1.00 | 2.00 | 2.00 | 1.00 | 2.00 | 2.00 | 1.00 |
| 1.00 | 2.00 | 1.00 | 2.00 | 1.00 | 2.00 | 1.00 | 1.00 | 2.00 | 1.00 | 1.00 |
| 1.00 | 2.00 | 2.00 | 2.00 | 1.00 | 2.00 | 2.00 | 2.00 | 2.00 | 2.00 | 2.00 |
| 2.00 | 1.00 | 2.00 | 1.00 | 1.00 | 2.00 | 2.00 | 1.00 | 1.00 | 2.00 | 1.00 |
| 2.00 | 1.00 | 1.00 | 1.00 | 3.00 | 3.00 | 2.00 | 2.00 | 2.00 | 2.00 | 2.00 |
| 2.00 | 2.00 | 1.00 | 1.00 | 4.00 | 2.00 | 1.00 | 1.00 | 1.00 | 2.00 | 1.00 |
| 3.00 | 3.00 | 1.00 | 1.00 | 4.00 | 2.00 | 2.00 | 1.00 | 3.00 | 2.00 | 1.00 |
| 2.00 | 3.00 | 2.00 | 1.00 | 4.00 | 1.00 | 1.00 | 1.00 | 2.00 | 1.00 | 3.00 |
| 5.00 | 1.00 | 2.00 | 1.00 | 5.00 | 1.00 | 1.00 | 5.00 | 1.00 | 1.00 | 3.00 |
| 3.00 | 2.00 | 1.00 | 1.00 | 4.00 | 2.00 | 2.00 | 3.00 | 3.00 | 4.00 | 2.00 |
| 3.00 | 3.00 | 2.00 | 1.00 | 2.00 | 3.00 | 2.00 | 3.00 | 3.00 | 3.00 | 3.00 |
| 2.00 | 2.00 | 3.00 | 4.00 | 4.00 | 2.00 | 3.00 | 4.00 | 3.00 | 2.00 | 1.00 |
| 3.00 | 3.00 | 2.00 | 1.00 | 2.00 | 2.00 | 1.00 | 3.00 | 1.00 | 2.00 | 3.00 |
| 2.00 | 1.00 | 1.00 | 2.00 | 1.00 | 2.00 | 1.00 | 2.00 | 1.00 | 2.00 | 1.00 |
| 2.00 | 2.00 | 2.00 | 2.00 | 5.00 | 4.00 | 2.00 | 3.00 | 3.00 | 4.00 | 2.00 |
| 1.00 | 1.00 | 1.00 | 1.00 | 1.00 | 2.00 | 3.00 | 3.00 | 3.00 | 1.00 | 1.00 |
| 1.00 | 1.00 | 2.00 | 2.00 | 1.00 | 1.00 | 2.00 | 1.00 | 2.00 | 1.00 | 1.00 |
| 2.00 | 1.00 | 2.00 | 2.00 | 1.00 | 1.00 | 2.00 | 1.00 | 2.00 | 1.00 | 2.00 |

|      |      |      |      |      |      |      |      |      |      |      |
|------|------|------|------|------|------|------|------|------|------|------|
| 1.00 | 1.00 | 3.00 | 2.00 | 1.00 | 1.00 | 1.00 | 3.00 | 2.00 | 2.00 | 1.00 |
| 5.00 | 5.00 | 5.00 | 1.00 | 1.00 | 2.00 | 3.00 | 2.00 | 1.00 | 2.00 | 3.00 |
| 1.00 | 1.00 | 1.00 | 1.00 | 2.00 | 2.00 | 2.00 | 2.00 | 2.00 | 3.00 | 3.00 |
| 2.00 | 1.00 | 2.00 | 1.00 | 1.00 | 1.00 | 2.00 | 1.00 | 2.00 | 1.00 | 2.00 |
| 1.00 | 1.00 | 1.00 | 1.00 | 1.00 | 2.00 | 3.00 | 3.00 | 2.00 | 1.00 | 1.00 |
| 4.00 | 3.00 | 2.00 | 1.00 | 1.00 | 1.00 | 1.00 | 1.00 | 1.00 | 1.00 | 1.00 |
| 1.00 | 1.00 | 2.00 | 2.00 | 2.00 | 2.00 | 2.00 | 1.00 | 3.00 | 1.00 | 1.00 |
| 5.00 | 5.00 | 4.00 | 1.00 | 2.00 | 2.00 | 2.00 | 2.00 | 2.00 | 2.00 | 2.00 |
| 5.00 | 5.00 | 5.00 | 5.00 | 1.00 | 1.00 | 1.00 | 1.00 | 1.00 | 1.00 | 1.00 |
| 1.00 | 2.00 | 1.00 | 2.00 | 1.00 | 2.00 | 1.00 | 1.00 | 2.00 | 1.00 | 2.00 |
| 2.00 | 2.00 | 1.00 | 2.00 | 1.00 | 2.00 | 2.00 | 1.00 | 1.00 | 2.00 | 1.00 |
| 1.00 | 1.00 | 1.00 | 1.00 | 1.00 | 2.00 | 2.00 | 2.00 | 2.00 | 2.00 | 3.00 |
| 3.00 | 4.00 | 4.00 | 1.00 | 1.00 | 2.00 | 2.00 | 2.00 | 5.00 | 4.00 | 3.00 |
| 1.00 | 1.00 | 1.00 | 1.00 | 1.00 | 2.00 | 2.00 | 2.00 | 2.00 | 3.00 | 1.00 |
| 1.00 | 1.00 | 1.00 | 1.00 | 1.00 | 2.00 | 2.00 | 1.00 | 1.00 | 2.00 | 2.00 |
| 2.00 | 2.00 | 1.00 | 1.00 | 1.00 | 2.00 | 2.00 | 2.00 | 3.00 | 3.00 | 3.00 |
| 2.00 | 2.00 | 2.00 | 2.00 | 2.00 | 2.00 | 1.00 | 1.00 | 1.00 | 1.00 | 1.00 |
| 2.00 | 1.00 | 1.00 | 2.00 | 1.00 | 2.00 | 1.00 | 1.00 | 2.00 | 2.00 | 1.00 |
| 3.00 | 1.00 | 1.00 | 1.00 | 5.00 | 2.00 | 3.00 | 2.00 | 2.00 | 2.00 | 2.00 |
| 2.00 | 4.00 | 3.00 | 1.00 | 3.00 | 2.00 | 3.00 | 4.00 | 2.00 | 3.00 | 2.00 |
| 2.00 | 3.00 | 4.00 | 2.00 | 1.00 | 2.00 | 2.00 | 3.00 | 5.00 | 4.00 | 3.00 |
| 5.00 | 5.00 | 5.00 | 5.00 | 4.00 | 4.00 | 5.00 | 5.00 | 5.00 | 5.00 | 5.00 |
| 3.00 | 3.00 | 1.00 | 1.00 | 4.00 | 3.00 | 3.00 | 2.00 | 2.00 | 2.00 | 2.00 |
| 2.00 | 2.00 | 2.00 | 2.00 | 2.00 | 1.00 | 1.00 | 1.00 | 2.00 | 2.00 | 3.00 |
| 1.00 | 1.00 | 1.00 | 1.00 | 1.00 | 1.00 | 2.00 | 2.00 | 1.00 | 1.00 | 1.00 |

| q21  | q22  | q23  | q24  | q25  | q26  |
|------|------|------|------|------|------|
| 3.00 | 1.00 | 1.00 | 3.00 | 1.00 | 1.00 |
| 2.00 | 3.00 | 3.00 | 3.00 | 2.00 | 2.00 |
| 2.00 | 1.00 | 2.00 | 1.00 | 3.00 | 3.00 |
| 2.00 | 3.00 | 3.00 | 3.00 | 3.00 | 1.00 |
| 1.00 | 2.00 | 2.00 | 2.00 | 1.00 | 2.00 |
| 1.00 | 2.00 | 1.00 | 1.00 | 1.00 | 2.00 |
| 2.00 | 1.00 | 1.00 | 1.00 | 2.00 | 1.00 |
| 1.00 | 1.00 | 3.00 | 3.00 | 3.00 | 3.00 |
| 2.00 | 3.00 | 4.00 | 3.00 | 3.00 | 2.00 |
| 3.00 | 3.00 | 2.00 | 2.00 | 4.00 | 4.00 |
| 2.00 | 2.00 | 2.00 | 2.00 | 2.00 | 2.00 |
| 1.00 | 1.00 | 1.00 | 1.00 | 1.00 | 1.00 |
| 1.00 | 3.00 | 1.00 | 5.00 | 2.00 | 2.00 |
| 2.00 | 3.00 | 1.00 | 1.00 | 1.00 | 2.00 |
| 2.00 | 2.00 | 2.00 | 3.00 | 2.00 | 2.00 |
| 2.00 | 3.00 | 4.00 | 4.00 | 3.00 | 2.00 |
| 2.00 | 3.00 | 3.00 | 3.00 | 2.00 | 2.00 |
| 2.00 | 3.00 | 2.00 | 1.00 | 2.00 | 1.00 |
| 2.00 | 3.00 | 3.00 | 2.00 | 2.00 | 3.00 |
| 3.00 | 2.00 | 1.00 | 1.00 | 2.00 | 3.00 |
| 1.00 | 2.00 | 2.00 | 1.00 | 1.00 | 1.00 |
| 2.00 | 3.00 | 4.00 | 5.00 | 1.00 | 1.00 |
| 1.00 | 2.00 | 2.00 | 2.00 | 2.00 | 2.00 |
| 1.00 | 2.00 | 2.00 | 1.00 | 1.00 | 1.00 |
| 3.00 | 4.00 | 3.00 | 5.00 | 4.00 | 5.00 |
| 1.00 | 3.00 | 2.00 | 1.00 | 2.00 | 3.00 |
| 2.00 | 2.00 | 2.00 | 2.00 | 2.00 | 3.00 |
| 2.00 | 3.00 | 3.00 | 1.00 | 2.00 | 2.00 |
| 3.00 | 1.00 | 2.00 | 2.00 | 1.00 | 1.00 |
| 1.00 | 1.00 | 1.00 | 1.00 | 3.00 | 1.00 |
| 3.00 | 2.00 | 2.00 | 2.00 | 3.00 | 3.00 |
| 2.00 | 2.00 | 3.00 | 3.00 | 2.00 | 2.00 |
| 3.00 | 1.00 | 3.00 | 2.00 | 3.00 | 2.00 |
| 2.00 | 3.00 | 3.00 | 3.00 | 2.00 | 3.00 |
| 1.00 | 1.00 | 2.00 | 2.00 | 3.00 | 1.00 |
| 3.00 | 2.00 | 2.00 | 2.00 | 4.00 | 4.00 |

|      |      |      |      |      |      |
|------|------|------|------|------|------|
| 2.00 | 2.00 | 2.00 | 2.00 | 2.00 | 2.00 |
| 2.00 | 2.00 | 2.00 | 2.00 | 2.00 | 2.00 |
| 4.00 | 2.00 | 2.00 | 2.00 | 2.00 | 2.00 |
| 3.00 | 2.00 | 2.00 | 2.00 | 2.00 | 1.00 |
| 2.00 | 2.00 | 4.00 | 4.00 | 4.00 | 4.00 |
| 3.00 | 1.00 | 2.00 | 2.00 | 3.00 | 3.00 |
| 3.00 | 3.00 | 2.00 | 2.00 | 2.00 | 2.00 |
| 4.00 | 2.00 | 3.00 | 2.00 | 3.00 | 3.00 |
| 3.00 | 3.00 | 2.00 | 2.00 | 5.00 | 4.00 |
| 3.00 | 2.00 | 2.00 | 2.00 | 2.00 | 4.00 |
| 3.00 | 1.00 | 1.00 | 1.00 | 3.00 | 3.00 |
| 2.00 | 3.00 | 1.00 | 1.00 | 4.00 | 4.00 |
| 2.00 | 2.00 | 1.00 | 1.00 | 3.00 | 3.00 |
| 2.00 | 3.00 | 4.00 | 5.00 | 4.00 | 2.00 |
| 1.00 | 3.00 | 4.00 | 1.00 | 1.00 | 3.00 |
| 1.00 | 3.00 | 4.00 | 1.00 | 1.00 | 3.00 |
| 2.00 | 1.00 | 1.00 | 1.00 | 2.00 | 1.00 |
| 3.00 | 4.00 | 3.00 | 4.00 | 3.00 | 4.00 |
| 1.00 | 3.00 | 4.00 | 1.00 | 1.00 | 3.00 |
| 1.00 | 3.00 | 4.00 | 1.00 | 1.00 | 3.00 |
| 2.00 | 2.00 | 3.00 | 3.00 | 1.00 | 3.00 |
| 3.00 | 4.00 | 5.00 | 5.00 | 4.00 | 3.00 |
| 1.00 | 2.00 | 1.00 | 1.00 | 2.00 | 2.00 |
| 3.00 | 2.00 | 2.00 | 2.00 | 4.00 | 2.00 |
| 2.00 | 2.00 | 2.00 | 1.00 | 2.00 | 2.00 |
| 3.00 | 2.00 | 2.00 | 2.00 | 4.00 | 5.00 |
| 1.00 | 3.00 | 4.00 | 1.00 | 1.00 | 3.00 |
| 1.00 | 3.00 | 4.00 | 1.00 | 1.00 | 3.00 |
| 2.00 | 2.00 | 2.00 | 2.00 | 2.00 | 2.00 |
| 3.00 | 1.00 | 2.00 | 3.00 | 2.00 | 3.00 |
| 3.00 | 1.00 | 2.00 | 3.00 | 2.00 | 3.00 |
| 2.00 | 2.00 | 2.00 | 2.00 | 2.00 | 2.00 |
| 1.00 | 1.00 | 2.00 | 1.00 | 1.00 | 1.00 |
| 2.00 | 1.00 | 2.00 | 1.00 | 1.00 | 2.00 |
| 1.00 | 1.00 | 1.00 | 1.00 | 1.00 | 1.00 |
| 4.00 | 2.00 | 4.00 | 2.00 | 5.00 | 1.00 |
| 2.00 | 1.00 | 2.00 | 1.00 | 2.00 | 2.00 |



|      |      |      |      |      |      |
|------|------|------|------|------|------|
| 3.00 | 2.00 | 1.00 | 1.00 | 1.00 | 2.00 |
| 3.00 | 3.00 | 1.00 | 2.00 | 1.00 | 1.00 |
| 1.00 | 2.00 | 1.00 | 2.00 | 2.00 | 2.00 |
| 2.00 | 4.00 | 4.00 | 3.00 | 2.00 | 4.00 |
| 2.00 | 4.00 | 2.00 | 4.00 | 2.00 | 2.00 |
| 2.00 | 1.00 | 2.00 | 3.00 | 4.00 | 4.00 |
| 3.00 | 4.00 | 2.00 | 1.00 | 3.00 | 3.00 |
| 5.00 | 3.00 | 2.00 | 3.00 | 5.00 | 5.00 |
| 2.00 | 5.00 | 3.00 | 2.00 | 2.00 | 2.00 |
| 1.00 | 2.00 | 2.00 | 1.00 | 2.00 | 2.00 |
| 1.00 | 2.00 | 1.00 | 2.00 | 1.00 | 2.00 |
| 2.00 | 1.00 | 2.00 | 1.00 | 2.00 | 2.00 |
| 2.00 | 1.00 | 2.00 | 1.00 | 2.00 | 2.00 |
| 1.00 | 2.00 | 1.00 | 2.00 | 1.00 | 1.00 |
| 1.00 | 2.00 | 1.00 | 2.00 | 1.00 | 1.00 |
| 1.00 | 2.00 | 2.00 | 1.00 | 1.00 | 1.00 |
| 3.00 | 3.00 | 1.00 | 1.00 | 1.00 | 1.00 |
| 1.00 | 2.00 | 1.00 | 3.00 | 2.00 | 2.00 |
| 2.00 | 1.00 | 2.00 | 3.00 | 2.00 | 2.00 |
| 3.00 | 2.00 | 3.00 | 2.00 | 2.00 | 2.00 |
| 3.00 | 2.00 | 2.00 | 2.00 | 3.00 | 2.00 |
| 2.00 | 1.00 | 2.00 | 1.00 | 2.00 | 2.00 |
| 5.00 | 2.00 | 4.00 | 1.00 | 3.00 | 3.00 |
| 4.00 | 3.00 | 4.00 | 4.00 | 4.00 | 4.00 |
| 1.00 | 2.00 | 1.00 | 2.00 | 1.00 | 1.00 |
| 1.00 | 1.00 | 2.00 | 2.00 | 1.00 | 1.00 |
| 2.00 | 1.00 | 2.00 | 1.00 | 1.00 | 2.00 |
| 5.00 | 5.00 | 3.00 | 2.00 | 1.00 | 1.00 |
| 3.00 | 2.00 | 1.00 | 1.00 | 2.00 | 2.00 |
| 2.00 | 2.00 | 1.00 | 1.00 | 1.00 | 3.00 |
| 1.00 | 1.00 | 2.00 | 1.00 | 2.00 | 2.00 |
| 4.00 | 1.00 | 1.00 | 1.00 | 2.00 | 2.00 |
| 2.00 | 1.00 | 2.00 | 2.00 | 1.00 | 1.00 |
| 1.00 | 1.00 | 1.00 | 2.00 | 2.00 | 1.00 |
| 3.00 | 1.00 | 2.00 | 4.00 | 3.00 | 3.00 |
| 3.00 | 3.00 | 2.00 | 2.00 | 1.00 | 2.00 |
| 3.00 | 2.00 | 2.00 | 3.00 | 2.00 | 2.00 |

|      |      |      |      |      |      |
|------|------|------|------|------|------|
| 1.00 | 2.00 | 1.00 | 2.00 | 1.00 | 1.00 |
| 1.00 | 2.00 | 1.00 | 2.00 | 1.00 | 1.00 |
| 1.00 | 1.00 | 2.00 | 1.00 | 2.00 | 1.00 |
| 1.00 | 1.00 | 2.00 | 1.00 | 2.00 | 1.00 |
| 3.00 | 2.00 | 1.00 | 2.00 | 1.00 | 1.00 |
| 1.00 | 2.00 | 1.00 | 2.00 | 2.00 | 2.00 |
| 2.00 | 1.00 | 3.00 | 3.00 | 2.00 | 1.00 |
| 1.00 | 2.00 | 2.00 | 1.00 | 2.00 | 3.00 |
| 2.00 | 1.00 | 2.00 | 2.00 | 1.00 | 1.00 |
| 2.00 | 1.00 | 2.00 | 2.00 | 2.00 | 2.00 |
| 1.00 | 1.00 | 2.00 | 3.00 | 1.00 | 1.00 |
| 3.00 | 2.00 | 2.00 | 2.00 | 3.00 | 3.00 |
| 2.00 | 1.00 | 2.00 | 2.00 | 1.00 | 1.00 |
| 2.00 | 1.00 | 2.00 | 1.00 | 2.00 | 2.00 |
| 2.00 | 1.00 | 2.00 | 1.00 | 2.00 | 2.00 |
| 3.00 | 4.00 | 3.00 | 2.00 | 1.00 | 1.00 |
| 1.00 | 1.00 | 1.00 | 1.00 | 2.00 | 2.00 |
| 1.00 | 1.00 | 2.00 | 1.00 | 2.00 | 1.00 |
| 1.00 | 1.00 | 1.00 | 1.00 | 1.00 | 1.00 |
| 3.00 | 3.00 | 3.00 | 2.00 | 1.00 | 1.00 |
| 1.00 | 2.00 | 3.00 | 3.00 | 2.00 | 1.00 |
| 1.00 | 1.00 | 1.00 | 1.00 | 1.00 | 1.00 |
| 2.00 | 1.00 | 3.00 | 3.00 | 5.00 | 5.00 |
| 3.00 | 2.00 | 3.00 | 2.00 | 1.00 | 1.00 |
| 2.00 | 1.00 | 2.00 | 1.00 | 1.00 | 2.00 |
| 2.00 | 3.00 | 1.00 | 1.00 | 2.00 | 2.00 |
| 2.00 | 1.00 | 1.00 | 1.00 | 2.00 | 2.00 |
| 3.00 | 2.00 | 2.00 | 2.00 | 2.00 | 2.00 |
| 3.00 | 1.00 | 2.00 | 2.00 | 2.00 | 3.00 |
| 3.00 | 2.00 | 2.00 | 3.00 | 2.00 | 3.00 |
| 3.00 | 1.00 | 4.00 | 4.00 | 3.00 | 3.00 |
| 2.00 | 1.00 | 2.00 | 2.00 | 2.00 | 2.00 |
| 4.00 | 1.00 | 1.00 | 1.00 | 1.00 | 3.00 |
| 1.00 | 1.00 | 1.00 | 1.00 | 1.00 | 1.00 |
| 4.00 | 1.00 | 1.00 | 1.00 | 1.00 | 3.00 |
| 3.00 | 1.00 | 3.00 | 1.00 | 1.00 | 5.00 |

|      |      |      |      |      |      |
|------|------|------|------|------|------|
| 3.00 | 1.00 | 2.00 | 2.00 | 2.00 | 2.00 |
| 4.00 | 2.00 | 3.00 | 4.00 | 2.00 | 1.00 |
| 4.00 | 3.00 | 3.00 | 4.00 | 2.00 | 1.00 |
| 4.00 | 2.00 | 3.00 | 4.00 | 2.00 | 1.00 |
| 2.00 | 1.00 | 2.00 | 1.00 | 2.00 | 1.00 |
| 1.00 | 1.00 | 2.00 | 2.00 | 2.00 | 2.00 |
| 4.00 | 2.00 | 1.00 | 1.00 | 1.00 | 4.00 |
| 2.00 | 3.00 | 2.00 | 2.00 | 2.00 | 3.00 |
| 1.00 | 3.00 | 2.00 | 2.00 | 1.00 | 3.00 |
| 2.00 | 2.00 | 4.00 | 2.00 | 3.00 | 2.00 |
| 3.00 | 1.00 | 1.00 | 1.00 | 2.00 | 1.00 |
| 4.00 | 4.00 | 4.00 | 3.00 | 4.00 | 1.00 |
| 3.00 | 3.00 | 3.00 | 3.00 | 2.00 | 2.00 |
| 5.00 | 1.00 | 2.00 | 4.00 | 1.00 | 4.00 |
| 2.00 | 1.00 | 2.00 | 1.00 | 1.00 | 2.00 |
| 3.00 | 2.00 | 2.00 | 2.00 | 2.00 | 2.00 |
| 4.00 | 1.00 | 4.00 | 3.00 | 4.00 | 4.00 |
| 2.00 | 3.00 | 2.00 | 2.00 | 2.00 | 2.00 |
| 3.00 | 1.00 | 3.00 | 3.00 | 2.00 | 2.00 |
| 1.00 | 5.00 | 2.00 | 2.00 | 1.00 | 3.00 |
| 1.00 | 2.00 | 1.00 | 2.00 | 1.00 | 1.00 |
| 2.00 | 2.00 | 2.00 | 2.00 | 2.00 | 2.00 |
| 1.00 | 3.00 | 2.00 | 1.00 | 2.00 | 2.00 |
| 2.00 | 1.00 | 2.00 | 2.00 | 1.00 | 1.00 |
| 2.00 | 1.00 | 1.00 | 1.00 | 1.00 | 1.00 |
| 3.00 | 2.00 | 1.00 | 2.00 | 1.00 | 1.00 |
| 1.00 | 1.00 | 2.00 | 3.00 | 2.00 | 1.00 |
| 3.00 | 3.00 | 2.00 | 1.00 | 5.00 | 4.00 |
| 2.00 | 3.00 | 3.00 | 3.00 | 2.00 | 1.00 |
| 3.00 | 1.00 | 2.00 | 1.00 | 2.00 | 2.00 |
| 1.00 | 1.00 | 2.00 | 3.00 | 1.00 | 1.00 |
| 3.00 | 2.00 | 3.00 | 3.00 | 2.00 | 3.00 |
| 2.00 | 1.00 | 1.00 | 1.00 | 2.00 | 2.00 |
| 1.00 | 1.00 | 1.00 | 1.00 | 3.00 | 4.00 |
| 2.00 | 1.00 | 3.00 | 3.00 | 2.00 | 5.00 |
| 2.00 | 2.00 | 2.00 | 3.00 | 3.00 | 2.00 |
| 1.00 | 1.00 | 2.00 | 2.00 | 1.00 | 1.00 |

|      |      |      |      |      |      |
|------|------|------|------|------|------|
| 2.00 | 1.00 | 2.00 | 2.00 | 1.00 | 1.00 |
| 1.00 | 3.00 | 1.00 | 2.00 | 1.00 | 1.00 |
| 4.00 | 1.00 | 1.00 | 1.00 | 2.00 | 2.00 |
| 2.00 | 1.00 | 2.00 | 1.00 | 1.00 | 1.00 |
| 1.00 | 2.00 | 2.00 | 2.00 | 1.00 | 1.00 |
| 2.00 | 2.00 | 3.00 | 3.00 | 4.00 | 3.00 |
| 2.00 | 1.00 | 2.00 | 2.00 | 2.00 | 3.00 |
| 2.00 | 2.00 | 3.00 | 3.00 | 2.00 | 2.00 |
| 2.00 | 2.00 | 1.00 | 1.00 | 1.00 | 2.00 |
| 3.00 | 4.00 | 5.00 | 4.00 | 2.00 | 2.00 |
| 3.00 | 2.00 | 3.00 | 3.00 | 2.00 | 3.00 |
| 1.00 | 1.00 | 1.00 | 1.00 | 1.00 | 1.00 |
| 2.00 | 3.00 | 2.00 | 2.00 | 2.00 | 2.00 |
| 3.00 | 3.00 | 2.00 | 2.00 | 3.00 | 4.00 |
| 3.00 | 2.00 | 2.00 | 2.00 | 2.00 | 3.00 |
| 1.00 | 2.00 | 2.00 | 1.00 | 2.00 | 2.00 |
| 2.00 | 1.00 | 2.00 | 2.00 | 1.00 | 1.00 |
| 1.00 | 1.00 | 2.00 | 2.00 | 2.00 | 2.00 |
| 1.00 | 1.00 | 2.00 | 2.00 | 1.00 | 1.00 |
| 2.00 | 1.00 | 2.00 | 1.00 | 2.00 | 2.00 |
| 2.00 | 2.00 | 1.00 | 2.00 | 2.00 | 2.00 |
| 2.00 | 1.00 | 1.00 | 2.00 | 1.00 | 1.00 |
| 2.00 | 1.00 | 2.00 | 1.00 | 2.00 | 2.00 |
| 1.00 | 1.00 | 1.00 | 1.00 | 1.00 | 1.00 |
| 2.00 | 2.00 | 2.00 | 2.00 | 1.00 | 1.00 |
| 2.00 | 2.00 | 1.00 | 2.00 | 2.00 | 1.00 |
| 2.00 | 1.00 | 1.00 | 1.00 | 4.00 | 1.00 |
| 5.00 | 1.00 | 2.00 | 3.00 | 5.00 | 5.00 |
| 3.00 | 2.00 | 2.00 | 3.00 | 5.00 | 5.00 |
| 3.00 | 3.00 | 2.00 | 2.00 | 2.00 | 3.00 |
| 1.00 | 1.00 | 2.00 | 2.00 | 2.00 | 2.00 |
| 3.00 | 2.00 | 1.00 | 1.00 | 1.00 | 2.00 |
| 1.00 | 2.00 | 1.00 | 1.00 | 2.00 | 2.00 |
| 3.00 | 2.00 | 2.00 | 2.00 | 2.00 | 1.00 |
| 1.00 | 1.00 | 1.00 | 1.00 | 2.00 | 1.00 |
| 2.00 | 1.00 | 2.00 | 1.00 | 2.00 | 2.00 |
| 1.00 | 2.00 | 1.00 | 1.00 | 2.00 | 2.00 |

|      |      |      |      |      |      |
|------|------|------|------|------|------|
| 1.00 | 2.00 | 2.00 | 1.00 | 2.00 | 2.00 |
| 2.00 | 1.00 | 2.00 | 3.00 | 1.00 | 1.00 |
| 2.00 | 1.00 | 1.00 | 2.00 | 1.00 | 1.00 |
| 1.00 | 3.00 | 1.00 | 1.00 | 1.00 | 1.00 |
| 1.00 | 1.00 | 1.00 | 1.00 | 1.00 | 1.00 |
| 2.00 | 3.00 | 4.00 | 5.00 | 4.00 | 3.00 |
| 1.00 | 1.00 | 1.00 | 1.00 | 2.00 | 3.00 |
| 1.00 | 3.00 | 3.00 | 1.00 | 2.00 | 5.00 |
| 1.00 | 1.00 | 1.00 | 1.00 | 1.00 | 1.00 |
| 2.00 | 1.00 | 2.00 | 1.00 | 2.00 | 2.00 |
| 1.00 | 2.00 | 1.00 | 2.00 | 1.00 | 1.00 |
| 3.00 | 3.00 | 2.00 | 1.00 | 1.00 | 1.00 |
| 2.00 | 1.00 | 1.00 | 1.00 | 1.00 | 1.00 |
| 1.00 | 1.00 | 1.00 | 2.00 | 1.00 | 1.00 |
| 1.00 | 1.00 | 2.00 | 2.00 | 2.00 | 2.00 |
| 2.00 | 2.00 | 2.00 | 2.00 | 2.00 | 2.00 |
| 1.00 | 1.00 | 1.00 | 1.00 | 1.00 | 1.00 |
| 1.00 | 2.00 | 1.00 | 2.00 | 2.00 | 2.00 |
| 2.00 | 2.00 | 2.00 | 2.00 | 2.00 | 2.00 |
| 5.00 | 1.00 | 1.00 | 4.00 | 3.00 | 3.00 |
| 2.00 | 3.00 | 2.00 | 2.00 | 1.00 | 2.00 |
| 5.00 | 5.00 | 5.00 | 5.00 | 5.00 | 5.00 |
| 3.00 | 3.00 | 3.00 | 2.00 | 3.00 | 3.00 |
| 3.00 | 2.00 | 2.00 | 2.00 | 2.00 | 2.00 |
| 2.00 | 1.00 | 1.00 | 1.00 | 1.00 | 1.00 |
